# Supplementary material
Source: publisher figshare collection journal article supplement (https://acs.figshare.com/ndownloader/files/5886747)
Supplement: Supplementary file 1 [file 5886747]

 
data_2
 
_audit_creation_method            SHELXL-97 
_chemical_name_systematic 
; 
 ? 
; 
_chemical_name_common             ? 
_chemical_melting_point           ? 
_chemical_formula_moiety          ? 
_chemical_formula_sum 
 'C20 H36 Br2 S4 Si4' 
_chemical_formula_weight          676.91 
 
loop_ 
 _atom_type_symbol 
 _atom_type_description 
 _atom_type_scat_dispersion_real 
 _atom_type_scat_dispersion_imag 
 _atom_type_scat_source 
 'C'  'C'   0.0033   0.0016 
 'International Tables Vol C Tables 4.2.6.8 and 6.1.1.4' 
 'H'  'H'   0.0000   0.0000 
 'International Tables Vol C Tables 4.2.6.8 and 6.1.1.4' 
 'Si'  'Si'   0.0817   0.0704 
 'International Tables Vol C Tables 4.2.6.8 and 6.1.1.4' 
 'S'  'S'   0.1246   0.1234 
 'International Tables Vol C Tables 4.2.6.8 and 6.1.1.4' 
 'Br'  'Br'  -0.2901   2.4595 
 'International Tables Vol C Tables 4.2.6.8 and 6.1.1.4' 
 
_symmetry_cell_setting           'Orthorhombic'
_symmetry_space_group_name_H-M   'Fdd2 ' 
 
loop_ 
 _symmetry_equiv_pos_as_xyz 
 'x, y, z' 
 '-x, -y, z' 
 'x+1/4, -y+1/4, z+1/4' 
 '-x+1/4, y+1/4, z+1/4' 
 'x, y+1/2, z+1/2' 
 '-x, -y+1/2, z+1/2' 
 'x+1/4, -y+3/4, z+3/4' 
 '-x+1/4, y+3/4, z+3/4' 
 'x+1/2, y, z+1/2' 
 '-x+1/2, -y, z+1/2' 
 'x+3/4, -y+1/4, z+3/4' 
 '-x+3/4, y+1/4, z+3/4' 
 'x+1/2, y+1/2, z' 
 '-x+1/2, -y+1/2, z' 
 'x+3/4, -y+3/4, z+1/4' 
 '-x+3/4, y+3/4, z+1/4' 
 
_cell_length_a                    19.680(5) 
_cell_length_b                    46.734(11) 
_cell_length_c                    6.8945(17) 
_cell_angle_alpha                 90.00 
_cell_angle_beta                  90.00 
_cell_angle_gamma                 90.00 
_cell_volume                      6341(3) 
_cell_formula_units_Z             8 
_cell_measurement_temperature     296(2) 
_cell_measurement_reflns_used    3167
_cell_measurement_theta_min        2.71
_cell_measurement_theta_max       24.20 
 
_exptl_crystal_description        block 
_exptl_crystal_colour             colorless
_exptl_crystal_size_max           0.58 
_exptl_crystal_size_mid           0.49 
_exptl_crystal_size_min           0.39 
_exptl_crystal_density_meas       ? 
_exptl_crystal_density_diffrn     1.418 
_exptl_crystal_density_method     'not measured' 
_exptl_crystal_F_000              2768 
_exptl_absorpt_coefficient_mu     2.980 
_exptl_absorpt_correction_type    Multi-scan 
_exptl_absorpt_correction_T_min   0.2768 
_exptl_absorpt_correction_T_max   0.3895 
_exptl_absorpt_process_details    SADABS 
 
_exptl_special_details 
; 
 ? 
; 
 
_diffrn_ambient_temperature       296(2) 
_diffrn_radiation_wavelength      0.71073 
_diffrn_radiation_type            MoK\a 
_diffrn_radiation_source          'fine-focus sealed tube' 
_diffrn_radiation_monochromator   graphite 
_diffrn_measurement_device_type  'CCD area detector'
_diffrn_measurement_method       'phi and omega scans'
_diffrn_detector_area_resol_mean  ? 
_diffrn_reflns_number             9880 
_diffrn_reflns_av_R_equivalents   0.0555 
_diffrn_reflns_av_sigmaI/netI     0.0803 
_diffrn_reflns_limit_h_min        -26 
_diffrn_reflns_limit_h_max        24 
_diffrn_reflns_limit_k_min        -47 
_diffrn_reflns_limit_k_max        62 
_diffrn_reflns_limit_l_min        -9 
_diffrn_reflns_limit_l_max        8 
_diffrn_reflns_theta_min          2.25 
_diffrn_reflns_theta_max          28.48 
_reflns_number_total              3436 
_reflns_number_gt                 2638 
_reflns_threshold_expression      >2sigma(I) 
 
_computing_data_collection      'Bruker SMART'
_computing_cell_refinement      'Bruker SMART'
_computing_data_reduction       'Bruker SAINT'
_computing_structure_solution   'Bruker SHELXTL'
_computing_structure_refinement 'Bruker SHELXTL'
_computing_molecular_graphics   'Bruker SHELXTL'
_computing_publication_material 'Bruker SHELXTL' 
 
_refine_special_details 
; 
 Refinement of F^2^ against ALL reflections.  The weighted R-factor wR and 
 goodness of fit S are based on F^2^, conventional R-factors R are based 
 on F, with F set to zero for negative F^2^. The threshold expression of 
 F^2^ > 2sigma(F^2^) is used only for calculating R-factors(gt) etc. and is 
 not relevant to the choice of reflections for refinement.  R-factors based 
 on F^2^ are statistically about twice as large as those based on F, and R- 
 factors based on ALL data will be even larger. 
; 
 
_refine_ls_structure_factor_coef  Fsqd  
_refine_ls_matrix_type            full 
_refine_ls_weighting_scheme       calc  
_refine_ls_weighting_details 
 'calc w=1/[\s^2^(Fo^2^)+(0.0125P)^2^+0.0000P] where P=(Fo^2^+2Fc^2^)/3' 
_atom_sites_solution_primary      direct 
_atom_sites_solution_secondary    difmap 
_atom_sites_solution_hydrogens    geom 
_refine_ls_hydrogen_treatment     constr
_refine_ls_extinction_method      none 
_refine_ls_extinction_coef        ? 
_refine_ls_abs_structure_details 
 'Flack H D (1983), Acta Cryst. A39, 876-881' 
_refine_ls_abs_structure_Flack    0.062(10) 
_refine_ls_number_reflns          3436 
_refine_ls_number_parameters      137 
_refine_ls_number_restraints      1 
_refine_ls_R_factor_all           0.0619 
_refine_ls_R_factor_gt            0.0389 
_refine_ls_wR_factor_ref          0.0887 
_refine_ls_wR_factor_gt           0.0811 
_refine_ls_goodness_of_fit_ref    1.004 
_refine_ls_restrained_S_all       1.004 
_refine_ls_shift/su_max           0.000 
_refine_ls_shift/su_mean          0.000 
 
loop_ 
 _atom_site_label 
 _atom_site_type_symbol 
 _atom_site_fract_x 
 _atom_site_fract_y 
 _atom_site_fract_z 
 _atom_site_U_iso_or_equiv 
 _atom_site_adp_type 
 _atom_site_occupancy 
 _atom_site_symmetry_multiplicity 
 _atom_site_calc_flag 
 _atom_site_refinement_flags 
 _atom_site_disorder_assembly 
 _atom_site_disorder_group 
Br1 Br -0.14765(2) 0.191658(11) 0.76603(7) 0.07075(18) Uani 1 1 d . . . 
S1 S -0.27532(4) 0.17651(2) 1.26724(15) 0.0417(2) Uani 1 1 d . . . 
S2 S -0.28899(5) 0.23531(2) 0.80415(15) 0.0463(2) Uani 1 1 d . . . 
Si1 Si -0.14279(5) 0.14284(3) 1.18071(19) 0.0491(3) Uani 1 1 d . . . 
Si2 Si -0.38676(4) 0.22327(2) 1.22669(17) 0.0417(3) Uani 1 1 d . . . 
C1 C -0.1235(3) 0.11845(12) 0.9772(10) 0.0821(16) Uani 1 1 d . . . 
H1A H -0.0904 0.1046 1.0178 0.123 Uiso 1 1 calc R . . 
H1B H -0.1058 0.1293 0.8701 0.123 Uiso 1 1 calc R . . 
H1C H -0.1643 0.1088 0.9378 0.123 Uiso 1 1 calc R . . 
C2 C -0.06561(19) 0.16180(10) 1.2607(10) 0.0810(16) Uani 1 1 d . . . 
H2A H -0.0315 0.1481 1.2966 0.121 Uiso 1 1 calc R . . 
H2B H -0.0762 0.1736 1.3704 0.121 Uiso 1 1 calc R . . 
H2C H -0.0489 0.1735 1.1568 0.121 Uiso 1 1 calc R . . 
C3 C -0.1774(2) 0.12232(11) 1.3872(8) 0.0762(15) Uani 1 1 d . . . 
H3A H -0.1453 0.1079 1.4254 0.114 Uiso 1 1 calc R . . 
H3B H -0.2192 0.1134 1.3494 0.114 Uiso 1 1 calc R . . 
H3C H -0.1856 0.1350 1.4941 0.114 Uiso 1 1 calc R . . 
C4 C -0.20792(16) 0.17040(8) 1.1130(6) 0.0386(8) Uani 1 1 d . . . 
C5 C -0.21181(15) 0.18976(7) 0.9665(6) 0.0375(8) Uani 1 1 d . . . 
C6 C -0.26754(16) 0.20951(7) 0.9793(5) 0.0349(8) Uani 1 1 d . . . 
C7 C -0.30769(15) 0.20456(7) 1.1377(6) 0.0348(8) Uani 1 1 d . . . 
C8 C -0.45158(18) 0.22344(13) 1.0312(10) 0.0833(16) Uani 1 1 d . . . 
H8A H -0.4346 0.2340 0.9219 0.125 Uiso 1 1 calc R . . 
H8B H -0.4924 0.2323 1.0779 0.125 Uiso 1 1 calc R . . 
H8C H -0.4612 0.2041 0.9925 0.125 Uiso 1 1 calc R . . 
C9 C -0.4198(2) 0.20281(10) 1.4375(8) 0.0660(13) Uani 1 1 d . . . 
H9A H -0.4601 0.2119 1.4858 0.099 Uiso 1 1 calc R . . 
H9B H -0.3860 0.2023 1.5379 0.099 Uiso 1 1 calc R . . 
H9C H -0.4303 0.1836 1.3979 0.099 Uiso 1 1 calc R . . 
C10 C -0.3643(2) 0.26002(10) 1.3038(8) 0.0661(13) Uani 1 1 d . . . 
H10A H -0.3475 0.2706 1.1945 0.099 Uiso 1 1 calc R . . 
H10B H -0.3300 0.2592 1.4025 0.099 Uiso 1 1 calc R . . 
H10C H -0.4040 0.2694 1.3545 0.099 Uiso 1 1 calc R . . 
 
loop_ 
 _atom_site_aniso_label 
 _atom_site_aniso_U_11 
 _atom_site_aniso_U_22 
 _atom_site_aniso_U_33 
 _atom_site_aniso_U_23 
 _atom_site_aniso_U_13 
 _atom_site_aniso_U_12 
Br1 0.0840(3) 0.0649(3) 0.0634(3) 0.0024(2) 0.0320(3) 0.0183(2) 
S1 0.0377(4) 0.0372(5) 0.0502(6) 0.0065(5) 0.0011(4) 0.0018(3) 
S2 0.0592(5) 0.0384(5) 0.0414(5) 0.0012(4) -0.0120(4) 0.0022(4) 
Si1 0.0415(5) 0.0390(6) 0.0667(8) -0.0039(6) -0.0050(5) 0.0089(4) 
Si2 0.0337(4) 0.0370(6) 0.0544(7) -0.0012(5) -0.0005(4) 0.0018(4) 
C1 0.089(3) 0.063(3) 0.094(5) -0.022(3) 0.003(3) 0.024(3) 
C2 0.045(2) 0.075(3) 0.122(5) -0.002(4) -0.014(3) 0.004(2) 
C3 0.077(3) 0.058(3) 0.093(4) 0.025(3) -0.007(3) 0.020(2) 
C4 0.0329(16) 0.033(2) 0.050(2) -0.0041(16) 0.0006(15) 0.0002(15) 
C5 0.0415(17) 0.0299(19) 0.041(2) -0.0037(16) 0.0045(16) 0.0006(14) 
C6 0.0434(16) 0.0269(18) 0.035(2) -0.0066(14) -0.0071(15) -0.0031(13) 
C7 0.0323(16) 0.0253(19) 0.047(2) -0.0024(15) -0.0045(15) 0.0005(14) 
C8 0.048(2) 0.111(4) 0.091(4) 0.004(4) -0.017(3) 0.009(3) 
C9 0.064(2) 0.050(3) 0.085(4) 0.005(2) 0.025(3) -0.003(2) 
C10 0.071(2) 0.049(3) 0.079(4) -0.005(3) 0.029(3) -0.001(2) 
 
_geom_special_details 
; 
 All esds (except the esd in the dihedral angle between two l.s. planes) 
 are estimated using the full covariance matrix.  The cell esds are taken 
 into account individually in the estimation of esds in distances, angles 
 and torsion angles; correlations between esds in cell parameters are only 
 used when they are defined by crystal symmetry.  An approximate (isotropic) 
 treatment of cell esds is used for estimating esds involving l.s. planes. 
; 
 
loop_ 
 _geom_bond_atom_site_label_1 
 _geom_bond_atom_site_label_2 
 _geom_bond_distance 
 _geom_bond_site_symmetry_2 
 _geom_bond_publ_flag 
Br1 C5 1.874(3) . ? 
S1 C7 1.710(4) . ? 
S1 C4 1.724(4) . ? 
S2 C6 1.758(4) . ? 
S2 S2 2.0592(19) 14_455 ? 
Si1 C2 1.843(4) . ? 
Si1 C3 1.846(5) . ? 
Si1 C1 1.847(6) . ? 
Si1 C4 1.876(4) . ? 
Si2 C10 1.851(5) . ? 
Si2 C8 1.856(5) . ? 
Si2 C9 1.857(5) . ? 
Si2 C7 1.888(3) . ? 
C1 H1A 0.9600 . ? 
C1 H1B 0.9600 . ? 
C1 H1C 0.9600 . ? 
C2 H2A 0.9600 . ? 
C2 H2B 0.9600 . ? 
C2 H2C 0.9600 . ? 
C3 H3A 0.9600 . ? 
C3 H3B 0.9600 . ? 
C3 H3C 0.9600 . ? 
C4 C5 1.358(5) . ? 
C5 C6 1.436(5) . ? 
C6 C7 1.367(5) . ? 
C8 H8A 0.9600 . ? 
C8 H8B 0.9600 . ? 
C8 H8C 0.9600 . ? 
C9 H9A 0.9600 . ? 
C9 H9B 0.9600 . ? 
C9 H9C 0.9600 . ? 
C10 H10A 0.9600 . ? 
C10 H10B 0.9600 . ? 
C10 H10C 0.9600 . ? 
 
loop_ 
 _geom_angle_atom_site_label_1 
 _geom_angle_atom_site_label_2 
 _geom_angle_atom_site_label_3 
 _geom_angle 
 _geom_angle_site_symmetry_1 
 _geom_angle_site_symmetry_3 
 _geom_angle_publ_flag 
C7 S1 C4 95.25(18) . . ? 
C6 S2 S2 106.17(11) . 14_455 ? 
C2 Si1 C3 108.8(3) . . ? 
C2 Si1 C1 110.8(2) . . ? 
C3 Si1 C1 109.9(3) . . ? 
C2 Si1 C4 107.91(19) . . ? 
C3 Si1 C4 107.25(19) . . ? 
C1 Si1 C4 112.0(2) . . ? 
C10 Si2 C8 111.6(2) . . ? 
C10 Si2 C9 109.6(2) . . ? 
C8 Si2 C9 109.3(2) . . ? 
C10 Si2 C7 109.06(17) . . ? 
C8 Si2 C7 109.4(2) . . ? 
C9 Si2 C7 107.73(19) . . ? 
Si1 C1 H1A 109.5 . . ? 
Si1 C1 H1B 109.5 . . ? 
H1A C1 H1B 109.5 . . ? 
Si1 C1 H1C 109.5 . . ? 
H1A C1 H1C 109.5 . . ? 
H1B C1 H1C 109.5 . . ? 
Si1 C2 H2A 109.5 . . ? 
Si1 C2 H2B 109.5 . . ? 
H2A C2 H2B 109.5 . . ? 
Si1 C2 H2C 109.5 . . ? 
H2A C2 H2C 109.5 . . ? 
H2B C2 H2C 109.5 . . ? 
Si1 C3 H3A 109.5 . . ? 
Si1 C3 H3B 109.5 . . ? 
H3A C3 H3B 109.5 . . ? 
Si1 C3 H3C 109.5 . . ? 
H3A C3 H3C 109.5 . . ? 
H3B C3 H3C 109.5 . . ? 
C5 C4 S1 107.8(2) . . ? 
C5 C4 Si1 132.9(3) . . ? 
S1 C4 Si1 119.1(2) . . ? 
C4 C5 C6 115.2(3) . . ? 
C4 C5 Br1 122.8(2) . . ? 
C6 C5 Br1 122.0(3) . . ? 
C7 C6 C5 112.5(3) . . ? 
C7 C6 S2 121.7(2) . . ? 
C5 C6 S2 125.6(3) . . ? 
C6 C7 S1 109.4(2) . . ? 
C6 C7 Si2 131.1(3) . . ? 
S1 C7 Si2 119.5(2) . . ? 
Si2 C8 H8A 109.5 . . ? 
Si2 C8 H8B 109.5 . . ? 
H8A C8 H8B 109.5 . . ? 
Si2 C8 H8C 109.5 . . ? 
H8A C8 H8C 109.5 . . ? 
H8B C8 H8C 109.5 . . ? 
Si2 C9 H9A 109.5 . . ? 
Si2 C9 H9B 109.5 . . ? 
H9A C9 H9B 109.5 . . ? 
Si2 C9 H9C 109.5 . . ? 
H9A C9 H9C 109.5 . . ? 
H9B C9 H9C 109.5 . . ? 
Si2 C10 H10A 109.5 . . ? 
Si2 C10 H10B 109.5 . . ? 
H10A C10 H10B 109.5 . . ? 
Si2 C10 H10C 109.5 . . ? 
H10A C10 H10C 109.5 . . ? 
H10B C10 H10C 109.5 . . ? 
 
loop_ 
 _geom_torsion_atom_site_label_1 
 _geom_torsion_atom_site_label_2 
 _geom_torsion_atom_site_label_3 
 _geom_torsion_atom_site_label_4 
 _geom_torsion 
 _geom_torsion_site_symmetry_1 
 _geom_torsion_site_symmetry_2 
 _geom_torsion_site_symmetry_3 
 _geom_torsion_site_symmetry_4 
 _geom_torsion_publ_flag 
C7 S1 C4 C5 -0.2(3) . . . . ? 
C7 S1 C4 Si1 174.7(2) . . . . ? 
C2 Si1 C4 C5 68.0(4) . . . . ? 
C3 Si1 C4 C5 -174.9(4) . . . . ? 
C1 Si1 C4 C5 -54.2(4) . . . . ? 
C2 Si1 C4 S1 -105.4(3) . . . . ? 
C3 Si1 C4 S1 11.7(3) . . . . ? 
C1 Si1 C4 S1 132.4(3) . . . . ? 
S1 C4 C5 C6 0.9(4) . . . . ? 
Si1 C4 C5 C6 -173.1(3) . . . . ? 
S1 C4 C5 Br1 178.74(19) . . . . ? 
Si1 C4 C5 Br1 4.8(5) . . . . ? 
C4 C5 C6 C7 -1.3(4) . . . . ? 
Br1 C5 C6 C7 -179.2(2) . . . . ? 
C4 C5 C6 S2 -175.5(3) . . . . ? 
Br1 C5 C6 S2 6.6(4) . . . . ? 
S2 S2 C6 C7 119.1(3) 14_455 . . . ? 
S2 S2 C6 C5 -67.2(3) 14_455 . . . ? 
C5 C6 C7 S1 1.1(3) . . . . ? 
S2 C6 C7 S1 175.55(18) . . . . ? 
C5 C6 C7 Si2 -179.7(3) . . . . ? 
S2 C6 C7 Si2 -5.3(5) . . . . ? 
C4 S1 C7 C6 -0.5(3) . . . . ? 
C4 S1 C7 Si2 -179.8(2) . . . . ? 
C10 Si2 C7 C6 -66.8(4) . . . . ? 
C8 Si2 C7 C6 55.5(4) . . . . ? 
C9 Si2 C7 C6 174.2(3) . . . . ? 
C10 Si2 C7 S1 112.3(3) . . . . ? 
C8 Si2 C7 S1 -125.4(3) . . . . ? 
C9 Si2 C7 S1 -6.7(3) . . . . ? 
 
_diffrn_measured_fraction_theta_max    0.987 
_diffrn_reflns_theta_full              28.48 
_diffrn_measured_fraction_theta_full   0.987 
_refine_diff_density_max    0.504 
_refine_diff_density_min   -0.326 
_refine_diff_density_rms    0.067 

#======#
 
data_3 
 
_audit_creation_method            SHELXL-97 
_chemical_name_systematic 
; 
 ? 
; 
_chemical_name_common             ? 
_chemical_melting_point           ? 
_chemical_formula_moiety          ? 
_chemical_formula_sum 
 'C14 H21 Br S3 Si2' 
_chemical_formula_weight          421.58 
 
loop_ 
 _atom_type_symbol 
 _atom_type_description 
 _atom_type_scat_dispersion_real 
 _atom_type_scat_dispersion_imag 
 _atom_type_scat_source 
 'C'  'C'   0.0033   0.0016 
 'International Tables Vol C Tables 4.2.6.8 and 6.1.1.4' 
 'H'  'H'   0.0000   0.0000 
 'International Tables Vol C Tables 4.2.6.8 and 6.1.1.4' 
 'Si'  'Si'   0.0817   0.0704 
 'International Tables Vol C Tables 4.2.6.8 and 6.1.1.4' 
 'S'  'S'   0.1246   0.1234 
 'International Tables Vol C Tables 4.2.6.8 and 6.1.1.4' 
 'Br'  'Br'  -0.2901   2.4595 
 'International Tables Vol C Tables 4.2.6.8 and 6.1.1.4' 
 
_symmetry_cell_setting           'Monoclinic'
_symmetry_space_group_name_H-M   'P2(1)/c  ' 
 
loop_ 
 _symmetry_equiv_pos_as_xyz 
 'x, y, z' 
 '-x, y+1/2, -z+1/2' 
 '-x, -y, -z' 
 'x, -y-1/2, z-1/2' 
 
_cell_length_a                    16.786(11) 
_cell_length_b                    10.680(7) 
_cell_length_c                    11.708(8) 
_cell_angle_alpha                 90.00 
_cell_angle_beta                  101.359(12) 
_cell_angle_gamma                 90.00 
_cell_volume                      2058(2) 
_cell_formula_units_Z             4 
_cell_measurement_temperature     296(2) 
_cell_measurement_reflns_used     3166
_cell_measurement_theta_min       2.27
_cell_measurement_theta_max       23.82
 
_exptl_crystal_description        block 
_exptl_crystal_colour             colorless 
_exptl_crystal_size_max           0.50 
_exptl_crystal_size_mid           0.39 
_exptl_crystal_size_min           0.32 
_exptl_crystal_density_meas       ? 
_exptl_crystal_density_diffrn     1.361 
_exptl_crystal_density_method     'not measured' 
_exptl_crystal_F_000              864 
_exptl_absorpt_coefficient_mu     2.408 
_exptl_absorpt_correction_type    Multi-scan 
_exptl_absorpt_correction_T_min   0.3789 
_exptl_absorpt_correction_T_max   0.5129 
_exptl_absorpt_process_details    SADABS 
 
_exptl_special_details 
; 
 ? 
; 
 
_diffrn_ambient_temperature       296(2) 
_diffrn_radiation_wavelength      0.71073 
_diffrn_radiation_type            MoK\a 
_diffrn_radiation_source          'fine-focus sealed tube' 
_diffrn_radiation_monochromator   graphite 
_diffrn_measurement_device_type  'CCD area detector'
_diffrn_measurement_method       'phi and omega scans'
_diffrn_detector_area_resol_mean  ? 
_diffrn_standards_number          ? 
_diffrn_standards_interval_count  ? 
_diffrn_standards_interval_time   ? 
_diffrn_standards_decay_%         ? 
_diffrn_reflns_number             10073 
_diffrn_reflns_av_R_equivalents   0.0301 
_diffrn_reflns_av_sigmaI/netI     0.0381 
_diffrn_reflns_limit_h_min        -19 
_diffrn_reflns_limit_h_max        19 
_diffrn_reflns_limit_k_min        -12 
_diffrn_reflns_limit_k_max        12 
_diffrn_reflns_limit_l_min        -7 
_diffrn_reflns_limit_l_max        13 
_diffrn_reflns_theta_min          2.60 
_diffrn_reflns_theta_max          25.00 
_reflns_number_total              3575 
_reflns_number_gt                 2715 
_reflns_threshold_expression      >2sigma(I) 
 
_computing_data_collection      'Bruker SMART'
_computing_cell_refinement      'Bruker SMART'
_computing_data_reduction       'Bruker SAINT'
_computing_structure_solution   'Bruker SHELXTL'
_computing_structure_refinement 'Bruker SHELXTL'
_computing_molecular_graphics   'Bruker SHELXTL'
_computing_publication_material 'Bruker SHELXTL'
 
_refine_special_details 
; 
 Refinement of F^2^ against ALL reflections.  The weighted R-factor wR and 
 goodness of fit S are based on F^2^, conventional R-factors R are based 
 on F, with F set to zero for negative F^2^. The threshold expression of 
 F^2^ > 2sigma(F^2^) is used only for calculating R-factors(gt) etc. and is 
 not relevant to the choice of reflections for refinement.  R-factors based 
 on F^2^ are statistically about twice as large as those based on F, and R- 
 factors based on ALL data will be even larger. 
; 
 
_refine_ls_structure_factor_coef  Fsqd  
_refine_ls_matrix_type            full 
_refine_ls_weighting_scheme       calc  
_refine_ls_weighting_details 
 'calc w=1/[\s^2^(Fo^2^)+(0.0711P)^2^+0.0000P] where P=(Fo^2^+2Fc^2^)/3' 
_atom_sites_solution_primary      direct 
_atom_sites_solution_secondary    difmap 
_atom_sites_solution_hydrogens    geom 
_refine_ls_hydrogen_treatment     constr 
_refine_ls_extinction_method      none 
_refine_ls_extinction_coef        ? 
_refine_ls_number_reflns          3575 
_refine_ls_number_parameters      181 
_refine_ls_number_restraints      0 
_refine_ls_R_factor_all           0.0566 
_refine_ls_R_factor_gt            0.0388 
_refine_ls_wR_factor_ref          0.1161 
_refine_ls_wR_factor_gt           0.1092 
_refine_ls_goodness_of_fit_ref    1.033 
_refine_ls_restrained_S_all       1.033 
_refine_ls_shift/su_max           0.001 
_refine_ls_shift/su_mean          0.000 
 
loop_ 
 _atom_site_label 
 _atom_site_type_symbol 
 _atom_site_fract_x 
 _atom_site_fract_y 
 _atom_site_fract_z 
 _atom_site_U_iso_or_equiv 
 _atom_site_adp_type 
 _atom_site_occupancy 
 _atom_site_symmetry_multiplicity 
 _atom_site_calc_flag 
 _atom_site_refinement_flags 
 _atom_site_disorder_assembly 
 _atom_site_disorder_group 
Br1 Br 0.40372(2) 0.56409(4) 0.91150(4) 0.07675(19) Uani 1 1 d . . . 
C1 C 0.29204(18) 0.5251(3) 0.8757(2) 0.0445(7) Uani 1 1 d . . . 
C2 C 0.25929(18) 0.4405(3) 0.7852(2) 0.0421(7) Uani 1 1 d . . . 
C3 C 0.17750(19) 0.4238(3) 0.7739(2) 0.0425(7) Uani 1 1 d . . . 
C4 C 0.23778(19) 0.5743(3) 0.9358(3) 0.0458(7) Uani 1 1 d . . . 
C5 C 0.3292(4) 0.6321(5) 1.1807(4) 0.1087(16) Uani 1 1 d . . . 
H5A H 0.3367 0.6914 1.2435 0.163 Uiso 1 1 calc R . . 
H5B H 0.3797 0.6203 1.1553 0.163 Uiso 1 1 calc R . . 
H5C H 0.3114 0.5537 1.2069 0.163 Uiso 1 1 calc R . . 
C6 C 0.2834(4) 0.8415(4) 1.0020(4) 0.1047(18) Uani 1 1 d . . . 
H6A H 0.2910 0.9030 1.0629 0.157 Uiso 1 1 calc R . . 
H6B H 0.2420 0.8695 0.9384 0.157 Uiso 1 1 calc R . . 
H6C H 0.3334 0.8298 0.9753 0.157 Uiso 1 1 calc R . . 
C7 C 0.1537(3) 0.7109(4) 1.1038(4) 0.0918(14) Uani 1 1 d . . . 
H7A H 0.1594 0.7704 1.1664 0.138 Uiso 1 1 calc R . . 
H7B H 0.1366 0.6318 1.1296 0.138 Uiso 1 1 calc R . . 
H7C H 0.1138 0.7406 1.0391 0.138 Uiso 1 1 calc R . . 
C8 C 0.0039(3) 0.3410(5) 0.7094(4) 0.0964(14) Uani 1 1 d . . . 
H8A H -0.0127 0.4270 0.6997 0.145 Uiso 1 1 calc R . . 
H8B H 0.0067 0.3164 0.7889 0.145 Uiso 1 1 calc R . . 
H8C H -0.0347 0.2892 0.6592 0.145 Uiso 1 1 calc R . . 
C9 C 0.1388(4) 0.1558(4) 0.6897(4) 0.1019(16) Uani 1 1 d . . . 
H9A H 0.1017 0.1040 0.6372 0.153 Uiso 1 1 calc R . . 
H9B H 0.1396 0.1298 0.7684 0.153 Uiso 1 1 calc R . . 
H9C H 0.1923 0.1480 0.6730 0.153 Uiso 1 1 calc R . . 
C10 C 0.1031(3) 0.3733(5) 0.5199(3) 0.1006(15) Uani 1 1 d . . . 
H10A H 0.0854 0.4588 0.5107 0.151 Uiso 1 1 calc R . . 
H10B H 0.0662 0.3212 0.4673 0.151 Uiso 1 1 calc R . . 
H10C H 0.1566 0.3663 0.5030 0.151 Uiso 1 1 calc R . . 
C11 C 0.37397(19) 0.2587(3) 0.7823(3) 0.0485(8) Uani 1 1 d . . . 
C12 C 0.3601(2) 0.2130(4) 0.8847(3) 0.0697(11) Uani 1 1 d . . . 
H12 H 0.3163 0.2364 0.9177 0.084 Uiso 1 1 calc R . . 
C13 C 0.4829(2) 0.1163(3) 0.8387(3) 0.0565(9) Uani 1 1 d . . . 
H13 H 0.5297 0.0711 0.8351 0.068 Uiso 1 1 calc R . . 
C14 C 0.4428(2) 0.2054(4) 0.7520(3) 0.0715(11) Uani 1 1 d . . . 
H14 H 0.4610 0.2245 0.6840 0.086 Uiso 1 1 calc R . . 
S1 S 0.14400(5) 0.51485(7) 0.87630(6) 0.0472(2) Uani 1 1 d . . . 
S2 S 0.31510(6) 0.36842(8) 0.69001(7) 0.0599(3) Uani 1 1 d . . . 
S3 S 0.43088(8) 0.10932(12) 0.94485(10) 0.0880(4) Uani 1 1 d . . . 
Si1 Si 0.25194(7) 0.69176(9) 1.05829(8) 0.0618(3) Uani 1 1 d . . . 
Si2 Si 0.10514(7) 0.32255(9) 0.67131(8) 0.0610(3) Uani 1 1 d . . . 
 
loop_ 
 _atom_site_aniso_label 
 _atom_site_aniso_U_11 
 _atom_site_aniso_U_22 
 _atom_site_aniso_U_33 
 _atom_site_aniso_U_23 
 _atom_site_aniso_U_13 
 _atom_site_aniso_U_12 
Br1 0.0434(2) 0.1022(4) 0.0855(3) 0.0004(2) 0.01464(19) -0.01016(19) 
C1 0.0406(17) 0.0488(17) 0.0455(16) 0.0077(14) 0.0122(13) 0.0038(14) 
C2 0.0455(18) 0.0437(17) 0.0404(16) 0.0056(13) 0.0164(13) 0.0121(13) 
C3 0.0522(19) 0.0395(16) 0.0360(15) -0.0015(12) 0.0095(13) 0.0058(13) 
C4 0.0474(18) 0.0458(17) 0.0459(17) -0.0029(13) 0.0133(14) -0.0018(14) 
C5 0.119(4) 0.137(4) 0.061(3) -0.010(3) -0.003(3) -0.017(3) 
C6 0.170(5) 0.061(3) 0.096(3) -0.020(2) 0.059(3) -0.030(3) 
C7 0.114(4) 0.086(3) 0.089(3) -0.027(2) 0.050(3) -0.004(3) 
C8 0.074(3) 0.125(4) 0.087(3) -0.020(3) 0.008(2) -0.033(3) 
C9 0.164(5) 0.055(2) 0.090(3) -0.021(2) 0.033(3) -0.016(3) 
C10 0.107(4) 0.143(4) 0.047(2) 0.002(3) 0.003(2) -0.025(3) 
C11 0.0510(19) 0.0509(19) 0.0468(17) 0.0061(14) 0.0173(14) 0.0127(15) 
C12 0.075(3) 0.083(3) 0.061(2) 0.0254(19) 0.0368(19) 0.035(2) 
C13 0.0479(19) 0.065(2) 0.063(2) 0.0205(17) 0.0275(15) 0.0335(17) 
C14 0.069(2) 0.087(3) 0.068(2) 0.019(2) 0.0373(19) 0.031(2) 
S1 0.0422(5) 0.0515(5) 0.0508(5) -0.0088(3) 0.0158(3) 0.0021(3) 
S2 0.0760(6) 0.0671(6) 0.0435(4) 0.0145(4) 0.0286(4) 0.0340(5) 
S3 0.0986(9) 0.0955(8) 0.0755(7) 0.0301(6) 0.0312(6) 0.0375(7) 
Si1 0.0835(7) 0.0563(6) 0.0488(5) -0.0143(4) 0.0212(5) -0.0143(5) 
Si2 0.0766(7) 0.0612(6) 0.0437(5) -0.0084(4) 0.0086(5) -0.0144(5) 
 
_geom_special_details 
; 
 All esds (except the esd in the dihedral angle between two l.s. planes) 
 are estimated using the full covariance matrix.  The cell esds are taken 
 into account individually in the estimation of esds in distances, angles 
 and torsion angles; correlations between esds in cell parameters are only 
 used when they are defined by crystal symmetry.  An approximate (isotropic) 
 treatment of cell esds is used for estimating esds involving l.s. planes. 
; 
 
loop_ 
 _geom_bond_atom_site_label_1 
 _geom_bond_atom_site_label_2 
 _geom_bond_distance 
 _geom_bond_site_symmetry_2 
 _geom_bond_publ_flag 
Br1 C1 1.885(3) . ? 
C1 C4 1.362(4) . ? 
C1 C2 1.419(4) . ? 
C2 C3 1.365(4) . ? 
C2 S2 1.767(3) . ? 
C3 S1 1.721(3) . ? 
C3 Si2 1.875(3) . ? 
C4 S1 1.713(3) . ? 
C4 Si1 1.884(3) . ? 
C5 Si1 1.847(5) . ? 
C5 H5A 0.9600 . ? 
C5 H5B 0.9600 . ? 
C5 H5C 0.9600 . ? 
C6 Si1 1.846(4) . ? 
C6 H6A 0.9600 . ? 
C6 H6B 0.9600 . ? 
C6 H6C 0.9600 . ? 
C7 Si1 1.841(4) . ? 
C7 H7A 0.9600 . ? 
C7 H7B 0.9600 . ? 
C7 H7C 0.9600 . ? 
C8 Si2 1.850(5) . ? 
C8 H8A 0.9600 . ? 
C8 H8B 0.9600 . ? 
C8 H8C 0.9600 . ? 
C9 Si2 1.867(5) . ? 
C9 H9A 0.9600 . ? 
C9 H9B 0.9600 . ? 
C9 H9C 0.9600 . ? 
C10 Si2 1.848(4) . ? 
C10 H10A 0.9600 . ? 
C10 H10B 0.9600 . ? 
C10 H10C 0.9600 . ? 
C11 C12 1.356(4) . ? 
C11 C14 1.395(4) . ? 
C11 S2 1.760(3) . ? 
C12 S3 1.674(4) . ? 
C12 H12 0.9300 . ? 
C13 C14 1.456(5) . ? 
C13 S3 1.655(3) . ? 
C13 H13 0.9300 . ? 
C14 H14 0.9300 . ? 
 
loop_ 
 _geom_angle_atom_site_label_1 
 _geom_angle_atom_site_label_2 
 _geom_angle_atom_site_label_3 
 _geom_angle 
 _geom_angle_site_symmetry_1 
 _geom_angle_site_symmetry_3 
 _geom_angle_publ_flag 
C4 C1 C2 115.6(3) . . ? 
C4 C1 Br1 122.4(2) . . ? 
C2 C1 Br1 121.9(2) . . ? 
C3 C2 C1 112.9(2) . . ? 
C3 C2 S2 122.1(2) . . ? 
C1 C2 S2 124.9(2) . . ? 
C2 C3 S1 108.7(2) . . ? 
C2 C3 Si2 130.5(2) . . ? 
S1 C3 Si2 120.85(18) . . ? 
C1 C4 S1 107.5(2) . . ? 
C1 C4 Si1 130.8(3) . . ? 
S1 C4 Si1 121.63(17) . . ? 
Si1 C5 H5A 109.5 . . ? 
Si1 C5 H5B 109.5 . . ? 
H5A C5 H5B 109.5 . . ? 
Si1 C5 H5C 109.5 . . ? 
H5A C5 H5C 109.5 . . ? 
H5B C5 H5C 109.5 . . ? 
Si1 C6 H6A 109.5 . . ? 
Si1 C6 H6B 109.5 . . ? 
H6A C6 H6B 109.5 . . ? 
Si1 C6 H6C 109.5 . . ? 
H6A C6 H6C 109.5 . . ? 
H6B C6 H6C 109.5 . . ? 
Si1 C7 H7A 109.5 . . ? 
Si1 C7 H7B 109.5 . . ? 
H7A C7 H7B 109.5 . . ? 
Si1 C7 H7C 109.5 . . ? 
H7A C7 H7C 109.5 . . ? 
H7B C7 H7C 109.5 . . ? 
Si2 C8 H8A 109.5 . . ? 
Si2 C8 H8B 109.5 . . ? 
H8A C8 H8B 109.5 . . ? 
Si2 C8 H8C 109.5 . . ? 
H8A C8 H8C 109.5 . . ? 
H8B C8 H8C 109.5 . . ? 
Si2 C9 H9A 109.5 . . ? 
Si2 C9 H9B 109.5 . . ? 
H9A C9 H9B 109.5 . . ? 
Si2 C9 H9C 109.5 . . ? 
H9A C9 H9C 109.5 . . ? 
H9B C9 H9C 109.5 . . ? 
Si2 C10 H10A 109.5 . . ? 
Si2 C10 H10B 109.5 . . ? 
H10A C10 H10B 109.5 . . ? 
Si2 C10 H10C 109.5 . . ? 
H10A C10 H10C 109.5 . . ? 
H10B C10 H10C 109.5 . . ? 
C12 C11 C14 111.9(3) . . ? 
C12 C11 S2 127.6(2) . . ? 
C14 C11 S2 120.6(2) . . ? 
C11 C12 S3 112.3(2) . . ? 
C11 C12 H12 123.9 . . ? 
S3 C12 H12 123.9 . . ? 
C14 C13 S3 108.2(2) . . ? 
C14 C13 H13 125.9 . . ? 
S3 C13 H13 125.9 . . ? 
C11 C14 C13 112.5(3) . . ? 
C11 C14 H14 123.8 . . ? 
C13 C14 H14 123.8 . . ? 
C4 S1 C3 95.32(15) . . ? 
C11 S2 C2 101.88(14) . . ? 
C13 S3 C12 95.17(16) . . ? 
C7 Si1 C6 110.0(2) . . ? 
C7 Si1 C5 110.2(2) . . ? 
C6 Si1 C5 111.7(3) . . ? 
C7 Si1 C4 107.96(18) . . ? 
C6 Si1 C4 107.86(18) . . ? 
C5 Si1 C4 109.0(2) . . ? 
C10 Si2 C8 110.8(2) . . ? 
C10 Si2 C9 109.8(2) . . ? 
C8 Si2 C9 110.2(2) . . ? 
C10 Si2 C3 109.44(19) . . ? 
C8 Si2 C3 107.09(17) . . ? 
C9 Si2 C3 109.5(2) . . ? 
 
loop_ 
 _geom_torsion_atom_site_label_1 
 _geom_torsion_atom_site_label_2 
 _geom_torsion_atom_site_label_3 
 _geom_torsion_atom_site_label_4 
 _geom_torsion 
 _geom_torsion_site_symmetry_1 
 _geom_torsion_site_symmetry_2 
 _geom_torsion_site_symmetry_3 
 _geom_torsion_site_symmetry_4 
 _geom_torsion_publ_flag 
C4 C1 C2 C3 0.4(4) . . . . ? 
Br1 C1 C2 C3 179.4(2) . . . . ? 
C4 C1 C2 S2 177.2(2) . . . . ? 
Br1 C1 C2 S2 -3.8(4) . . . . ? 
C1 C2 C3 S1 0.3(3) . . . . ? 
S2 C2 C3 S1 -176.70(15) . . . . ? 
C1 C2 C3 Si2 -179.1(2) . . . . ? 
S2 C2 C3 Si2 3.9(4) . . . . ? 
C2 C1 C4 S1 -0.8(3) . . . . ? 
Br1 C1 C4 S1 -179.77(15) . . . . ? 
C2 C1 C4 Si1 -178.1(2) . . . . ? 
Br1 C1 C4 Si1 2.9(4) . . . . ? 
C14 C11 C12 S3 1.4(5) . . . . ? 
S2 C11 C12 S3 179.7(2) . . . . ? 
C12 C11 C14 C13 -1.1(5) . . . . ? 
S2 C11 C14 C13 -179.5(3) . . . . ? 
S3 C13 C14 C11 0.3(4) . . . . ? 
C1 C4 S1 C3 0.8(2) . . . . ? 
Si1 C4 S1 C3 178.43(19) . . . . ? 
C2 C3 S1 C4 -0.6(2) . . . . ? 
Si2 C3 S1 C4 178.87(18) . . . . ? 
C12 C11 S2 C2 19.7(4) . . . . ? 
C14 C11 S2 C2 -162.2(3) . . . . ? 
C3 C2 S2 C11 -110.9(3) . . . . ? 
C1 C2 S2 C11 72.5(3) . . . . ? 
C14 C13 S3 C12 0.4(3) . . . . ? 
C11 C12 S3 C13 -1.1(4) . . . . ? 
C1 C4 Si1 C7 -177.3(3) . . . . ? 
S1 C4 Si1 C7 5.6(3) . . . . ? 
C1 C4 Si1 C6 63.8(4) . . . . ? 
S1 C4 Si1 C6 -113.2(3) . . . . ? 
C1 C4 Si1 C5 -57.6(4) . . . . ? 
S1 C4 Si1 C5 125.4(3) . . . . ? 
C2 C3 Si2 C10 -62.3(3) . . . . ? 
S1 C3 Si2 C10 118.4(3) . . . . ? 
C2 C3 Si2 C8 177.5(3) . . . . ? 
S1 C3 Si2 C8 -1.8(3) . . . . ? 
C2 C3 Si2 C9 58.1(3) . . . . ? 
S1 C3 Si2 C9 -121.3(2) . . . . ? 
 
_diffrn_measured_fraction_theta_max    0.988 
_diffrn_reflns_theta_full              25.00 
_diffrn_measured_fraction_theta_full   0.988 
_refine_diff_density_max    0.384 
_refine_diff_density_min   -0.564 
_refine_diff_density_rms    0.062 

#======#
 
data_4 
 
_audit_creation_method            SHELXL-97 
_chemical_name_systematic 
; 
 ? 
; 
_chemical_name_common             ? 
_chemical_melting_point           ? 
_chemical_formula_moiety          ? 
_chemical_formula_sum 
 'C14 H20 S3 Si2' 
_chemical_formula_weight          340.66 
 
loop_ 
 _atom_type_symbol 
 _atom_type_description 
 _atom_type_scat_dispersion_real 
 _atom_type_scat_dispersion_imag 
 _atom_type_scat_source 
 'C'  'C'   0.0033   0.0016 
 'International Tables Vol C Tables 4.2.6.8 and 6.1.1.4' 
 'H'  'H'   0.0000   0.0000 
 'International Tables Vol C Tables 4.2.6.8 and 6.1.1.4' 
 'Si'  'Si'   0.0817   0.0704 
 'International Tables Vol C Tables 4.2.6.8 and 6.1.1.4' 
 'S'  'S'   0.1246   0.1234 
 'International Tables Vol C Tables 4.2.6.8 and 6.1.1.4' 
 
_symmetry_cell_setting           'Orthorhombic'
_symmetry_space_group_name_H-M   'Pbcn '
 
loop_ 
 _symmetry_equiv_pos_as_xyz 
 'x, y, z' 
 '-x+1/2, -y+1/2, z+1/2' 
 '-x, y, -z+1/2' 
 'x+1/2, -y+1/2, -z' 
 '-x, -y, -z' 
 'x-1/2, y-1/2, -z-1/2' 
 'x, -y, z-1/2' 
 '-x-1/2, y-1/2, z' 
 
_cell_length_a                    32.516(7) 
_cell_length_b                    10.235(2) 
_cell_length_c                    11.456(2) 
_cell_angle_alpha                 90.00 
_cell_angle_beta                  90.00 
_cell_angle_gamma                 90.00 
_cell_volume                      3812.6(14) 
_cell_formula_units_Z             8 
_cell_measurement_temperature     296(2) 
_cell_measurement_reflns_used     5128
_cell_measurement_theta_min       2.51
_cell_measurement_theta_max       24.27
 
_exptl_crystal_description        block 
_exptl_crystal_colour             colorless 
_exptl_crystal_size_max           0.48 
_exptl_crystal_size_mid           0.37 
_exptl_crystal_size_min           0.25 
_exptl_crystal_density_meas       ? 
_exptl_crystal_density_diffrn     1.187 
_exptl_crystal_density_method     'not measured' 
_exptl_crystal_F_000              1440 
_exptl_absorpt_coefficient_mu     0.501 
_exptl_absorpt_correction_type    Multi-scan 
_exptl_absorpt_correction_T_min   0.7948 
_exptl_absorpt_correction_T_max   0.8849 
_exptl_absorpt_process_details    SADABS
 
_exptl_special_details 
; 
 ? 
; 
 
_diffrn_ambient_temperature       296(2) 
_diffrn_radiation_wavelength      0.71073 
_diffrn_radiation_type            MoK\a 
_diffrn_radiation_source          'fine-focus sealed tube' 
_diffrn_radiation_monochromator   graphite 
_diffrn_measurement_device_type   'CCD area detector'
_diffrn_measurement_method        'phi and omega scans'
_diffrn_detector_area_resol_mean  ? 
_diffrn_standards_number          ? 
_diffrn_standards_interval_count  ? 
_diffrn_standards_interval_time   ? 
_diffrn_standards_decay_%         ? 
_diffrn_reflns_number             21723 
_diffrn_reflns_av_R_equivalents   0.0712 
_diffrn_reflns_av_sigmaI/netI     0.0693 
_diffrn_reflns_limit_h_min        -33 
_diffrn_reflns_limit_h_max        43 
_diffrn_reflns_limit_k_min        -13 
_diffrn_reflns_limit_k_max        9 
_diffrn_reflns_limit_l_min        -14 
_diffrn_reflns_limit_l_max        14 
_diffrn_reflns_theta_min          2.09 
_diffrn_reflns_theta_max          28.47 
_reflns_number_total              4711 
_reflns_number_gt                 2837 
_reflns_threshold_expression      >2sigma(I) 
 
_computing_data_collection      'Bruker SMART'
_computing_cell_refinement      'Bruker SMART'
_computing_data_reduction       'Bruker SAINT'
_computing_structure_solution   'Bruker SHELXTL'
_computing_structure_refinement 'Bruker SHELXTL'
_computing_molecular_graphics   'Bruker SHELXTL'
_computing_publication_material 'Bruker SHELXTL'
 
_refine_special_details 
; 
 Refinement of F^2^ against ALL reflections.  The weighted R-factor wR and 
 goodness of fit S are based on F^2^, conventional R-factors R are based 
 on F, with F set to zero for negative F^2^. The threshold expression of 
 F^2^ > 2sigma(F^2^) is used only for calculating R-factors(gt) etc. and is 
 not relevant to the choice of reflections for refinement.  R-factors based 
 on F^2^ are statistically about twice as large as those based on F, and R- 
 factors based on ALL data will be even larger. 
; 
 
_refine_ls_structure_factor_coef  Fsqd  
_refine_ls_matrix_type            full 
_refine_ls_weighting_scheme       calc  
_refine_ls_weighting_details 
 'calc w=1/[\s^2^(Fo^2^)+(0.0522P)^2^+7.0798P] where P=(Fo^2^+2Fc^2^)/3' 
_atom_sites_solution_primary      direct 
_atom_sites_solution_secondary    difmap 
_atom_sites_solution_hydrogens    geom 
_refine_ls_hydrogen_treatment     constr 
_refine_ls_extinction_method      none 
_refine_ls_extinction_coef        ? 
_refine_ls_number_reflns          4711 
_refine_ls_number_parameters      172 
_refine_ls_number_restraints      7 
_refine_ls_R_factor_all           0.1233 
_refine_ls_R_factor_gt            0.0835 
_refine_ls_wR_factor_ref          0.2208 
_refine_ls_wR_factor_gt           0.2045 
_refine_ls_goodness_of_fit_ref    1.101 
_refine_ls_restrained_S_all       1.122 
_refine_ls_shift/su_max           0.000 
_refine_ls_shift/su_mean          0.000 
 
loop_ 
 _atom_site_label 
 _atom_site_type_symbol 
 _atom_site_fract_x 
 _atom_site_fract_y 
 _atom_site_fract_z 
 _atom_site_U_iso_or_equiv 
 _atom_site_adp_type 
 _atom_site_occupancy 
 _atom_site_symmetry_multiplicity 
 _atom_site_calc_flag 
 _atom_site_refinement_flags 
 _atom_site_disorder_assembly 
 _atom_site_disorder_group 
S1 S 0.10210(6) 0.48274(17) 0.37730(14) 0.0893(5) Uani 1 1 d . . . 
S2 S 0.04476(4) 0.23593(14) 0.61819(12) 0.0683(4) Uani 1 1 d . . . 
S3 S 0.16840(4) 0.23203(13) 0.73666(11) 0.0614(4) Uani 1 1 d . . . 
Si1 Si 0.20544(5) 0.42570(17) 0.55519(13) 0.0733(5) Uani 1 1 d . . . 
Si2 Si 0.10142(6) 0.0616(2) 0.86036(15) 0.0923(6) Uani 1 1 d U . . 
C1 C 0.16119(15) 0.3334(4) 0.6188(4) 0.0533(11) Uani 1 1 d . . . 
C2 C 0.12068(14) 0.3282(4) 0.5873(3) 0.0481(10) Uani 1 1 d . . . 
C3 C 0.09441(17) 0.3823(5) 0.4964(4) 0.0611(12) Uani 1 1 d . . . 
C4 C 0.05456(17) 0.3439(5) 0.5013(5) 0.0662(13) Uani 1 1 d . . . 
C5 C 0.11774(16) 0.1820(5) 0.7467(4) 0.0589(12) Uani 1 1 d . . . 
C6 C 0.09643(15) 0.2420(4) 0.6594(4) 0.0528(10) Uani 1 1 d . . . 
C7 C 0.0513(2) 0.4681(7) 0.3386(7) 0.102(2) Uani 1 1 d . . . 
H7 H 0.0401 0.5084 0.2731 0.122 Uiso 1 1 calc R . . 
C8 C 0.0291(2) 0.3927(6) 0.4119(6) 0.0844(17) Uani 1 1 d . . . 
H8A H 0.0011 0.3756 0.4046 0.101 Uiso 1 1 calc R . . 
C9 C 0.2504(2) 0.4078(8) 0.6526(6) 0.104(2) Uani 1 1 d . . . 
H9A H 0.2733 0.4548 0.6205 0.156 Uiso 1 1 calc R . . 
H9B H 0.2574 0.3170 0.6594 0.156 Uiso 1 1 calc R . . 
H9C H 0.2439 0.4421 0.7283 0.156 Uiso 1 1 calc R . . 
C10 C 0.1910(3) 0.6000(7) 0.5442(7) 0.121(3) Uani 1 1 d . . . 
H10A H 0.2134 0.6487 0.5116 0.182 Uiso 1 1 calc R . . 
H10B H 0.1846 0.6332 0.6205 0.182 Uiso 1 1 calc R . . 
H10C H 0.1673 0.6086 0.4948 0.182 Uiso 1 1 calc R . . 
C11 C 0.2172(2) 0.3565(10) 0.4095(6) 0.134(3) Uani 1 1 d . . . 
H11A H 0.2399 0.4029 0.3756 0.201 Uiso 1 1 calc R . . 
H11B H 0.1935 0.3649 0.3599 0.201 Uiso 1 1 calc R . . 
H11C H 0.2242 0.2658 0.4174 0.201 Uiso 1 1 calc R . . 
C12 C 0.0697(4) -0.0582(12) 0.7971(11) 0.211(5) Uani 1 1 d U . . 
H12A H 0.0613 -0.1196 0.8559 0.316 Uiso 1 1 calc R . . 
H12B H 0.0846 -0.1031 0.7369 0.316 Uiso 1 1 calc R . . 
H12C H 0.0458 -0.0173 0.7640 0.316 Uiso 1 1 calc R . . 
C13 C 0.0659(3) 0.1493(13) 0.9598(9) 0.201(6) Uani 1 1 d . . . 
H13A H 0.0566 0.0908 1.0198 0.302 Uiso 1 1 calc R . . 
H13B H 0.0426 0.1807 0.9163 0.302 Uiso 1 1 calc R . . 
H13C H 0.0799 0.2218 0.9948 0.302 Uiso 1 1 calc R . . 
C14 C 0.1460(3) 0.0133(11) 0.9471(9) 0.165(5) Uani 1 1 d . . . 
H14A H 0.1377 -0.0486 1.0055 0.247 Uiso 1 1 calc R . . 
H14B H 0.1576 0.0889 0.9842 0.247 Uiso 1 1 calc R . . 
H14C H 0.1662 -0.0260 0.8972 0.247 Uiso 1 1 calc R . . 
 
loop_ 
 _atom_site_aniso_label 
 _atom_site_aniso_U_11 
 _atom_site_aniso_U_22 
 _atom_site_aniso_U_33 
 _atom_site_aniso_U_23 
 _atom_site_aniso_U_13 
 _atom_site_aniso_U_12 
S1 0.1102(13) 0.0858(11) 0.0720(9) 0.0350(8) -0.0193(9) -0.0143(9) 
S2 0.0671(8) 0.0757(9) 0.0620(8) 0.0065(6) 0.0022(6) -0.0086(7) 
S3 0.0696(8) 0.0649(7) 0.0497(6) 0.0101(5) -0.0015(5) 0.0048(6) 
Si1 0.0779(10) 0.0862(11) 0.0557(8) 0.0004(7) 0.0069(7) -0.0207(8) 
Si2 0.1081(14) 0.1019(14) 0.0668(10) 0.0437(9) -0.0098(9) -0.0285(11) 
C1 0.067(3) 0.050(2) 0.043(2) -0.0010(19) 0.002(2) 0.005(2) 
C2 0.065(3) 0.042(2) 0.0372(19) 0.0008(17) 0.0057(19) 0.003(2) 
C3 0.081(3) 0.052(3) 0.049(2) 0.003(2) -0.006(2) 0.001(2) 
C4 0.069(3) 0.066(3) 0.063(3) 0.004(2) -0.004(3) 0.010(3) 
C5 0.076(3) 0.053(3) 0.048(2) 0.012(2) 0.003(2) 0.005(2) 
C6 0.070(3) 0.046(2) 0.042(2) -0.0004(18) 0.006(2) 0.005(2) 
C7 0.112(5) 0.094(5) 0.098(5) 0.032(4) -0.040(4) 0.001(4) 
C8 0.084(4) 0.086(4) 0.084(4) 0.016(3) -0.024(3) 0.002(3) 
C9 0.081(4) 0.136(6) 0.095(5) -0.003(5) 0.002(4) -0.001(4) 
C10 0.156(7) 0.089(5) 0.119(6) 0.037(4) -0.030(5) -0.049(5) 
C11 0.108(6) 0.231(11) 0.063(4) -0.018(5) 0.026(4) -0.038(6) 
C12 0.265(9) 0.190(8) 0.176(8) 0.070(7) -0.028(7) -0.092(7) 
C13 0.169(9) 0.276(15) 0.160(9) 0.131(10) 0.095(8) 0.071(9) 
C14 0.133(7) 0.182(9) 0.179(9) 0.132(8) -0.003(7) 0.019(7) 
 
_geom_special_details 
; 
 All esds (except the esd in the dihedral angle between two l.s. planes) 
 are estimated using the full covariance matrix.  The cell esds are taken 
 into account individually in the estimation of esds in distances, angles 
 and torsion angles; correlations between esds in cell parameters are only 
 used when they are defined by crystal symmetry.  An approximate (isotropic) 
 treatment of cell esds is used for estimating esds involving l.s. planes. 
; 
 
loop_ 
 _geom_bond_atom_site_label_1 
 _geom_bond_atom_site_label_2 
 _geom_bond_distance 
 _geom_bond_site_symmetry_2 
 _geom_bond_publ_flag 
S1 C7 1.718(7) . ? 
S1 C3 1.727(5) . ? 
S2 C6 1.746(5) . ? 
S2 C4 1.765(5) . ? 
S3 C1 1.719(4) . ? 
S3 C5 1.729(5) . ? 
Si1 C9 1.848(7) . ? 
Si1 C10 1.850(8) . ? 
Si1 C11 1.853(7) . ? 
Si1 C1 1.869(5) . ? 
Si2 C12 1.758(12) . ? 
Si2 C14 1.826(8) . ? 
Si2 C13 1.855(10) . ? 
Si2 C5 1.870(5) . ? 
C1 C2 1.367(6) . ? 
C2 C6 1.443(6) . ? 
C2 C3 1.456(6) . ? 
C3 C4 1.355(7) . ? 
C4 C8 1.409(7) . ? 
C5 C6 1.362(6) . ? 
C7 C8 1.349(9) . ? 
C7 H7 0.9300 . ? 
C8 H8A 0.9300 . ? 
C9 H9A 0.9600 . ? 
C9 H9B 0.9600 . ? 
C9 H9C 0.9600 . ? 
C10 H10A 0.9600 . ? 
C10 H10B 0.9600 . ? 
C10 H10C 0.9600 . ? 
C11 H11A 0.9600 . ? 
C11 H11B 0.9600 . ? 
C11 H11C 0.9600 . ? 
C12 H12A 0.9600 . ? 
C12 H12B 0.9600 . ? 
C12 H12C 0.9600 . ? 
C13 H13A 0.9600 . ? 
C13 H13B 0.9600 . ? 
C13 H13C 0.9600 . ? 
C14 H14A 0.9600 . ? 
C14 H14B 0.9600 . ? 
C14 H14C 0.9600 . ? 
 
loop_ 
 _geom_angle_atom_site_label_1 
 _geom_angle_atom_site_label_2 
 _geom_angle_atom_site_label_3 
 _geom_angle 
 _geom_angle_site_symmetry_1 
 _geom_angle_site_symmetry_3 
 _geom_angle_publ_flag 
C7 S1 C3 90.7(3) . . ? 
C6 S2 C4 90.5(2) . . ? 
C1 S3 C5 95.8(2) . . ? 
C9 Si1 C10 109.8(4) . . ? 
C9 Si1 C11 110.1(4) . . ? 
C10 Si1 C11 111.1(4) . . ? 
C9 Si1 C1 108.9(3) . . ? 
C10 Si1 C1 108.5(3) . . ? 
C11 Si1 C1 108.5(3) . . ? 
C12 Si2 C14 120.1(6) . . ? 
C12 Si2 C13 103.0(7) . . ? 
C14 Si2 C13 107.0(5) . . ? 
C12 Si2 C5 109.8(4) . . ? 
C14 Si2 C5 109.4(3) . . ? 
C13 Si2 C5 106.6(4) . . ? 
C2 C1 S3 108.4(3) . . ? 
C2 C1 Si1 131.2(3) . . ? 
S3 C1 Si1 120.4(3) . . ? 
C1 C2 C6 113.5(4) . . ? 
C1 C2 C3 137.7(4) . . ? 
C6 C2 C3 108.7(4) . . ? 
C4 C3 C2 114.9(4) . . ? 
C4 C3 S1 110.1(4) . . ? 
C2 C3 S1 135.0(4) . . ? 
C3 C4 C8 115.4(5) . . ? 
C3 C4 S2 112.7(4) . . ? 
C8 C4 S2 131.8(5) . . ? 
C6 C5 S3 107.6(3) . . ? 
C6 C5 Si2 131.6(4) . . ? 
S3 C5 Si2 120.8(3) . . ? 
C5 C6 C2 114.7(4) . . ? 
C5 C6 S2 132.2(4) . . ? 
C2 C6 S2 113.1(3) . . ? 
C8 C7 S1 113.8(5) . . ? 
C8 C7 H7 123.1 . . ? 
S1 C7 H7 123.1 . . ? 
C7 C8 C4 109.9(6) . . ? 
C7 C8 H8A 125.0 . . ? 
C4 C8 H8A 125.0 . . ? 
Si1 C9 H9A 109.5 . . ? 
Si1 C9 H9B 109.5 . . ? 
H9A C9 H9B 109.5 . . ? 
Si1 C9 H9C 109.5 . . ? 
H9A C9 H9C 109.5 . . ? 
H9B C9 H9C 109.5 . . ? 
Si1 C10 H10A 109.5 . . ? 
Si1 C10 H10B 109.5 . . ? 
H10A C10 H10B 109.5 . . ? 
Si1 C10 H10C 109.5 . . ? 
H10A C10 H10C 109.5 . . ? 
H10B C10 H10C 109.5 . . ? 
Si1 C11 H11A 109.5 . . ? 
Si1 C11 H11B 109.5 . . ? 
H11A C11 H11B 109.5 . . ? 
Si1 C11 H11C 109.5 . . ? 
H11A C11 H11C 109.5 . . ? 
H11B C11 H11C 109.5 . . ? 
Si2 C12 H12A 109.5 . . ? 
Si2 C12 H12B 109.5 . . ? 
H12A C12 H12B 109.5 . . ? 
Si2 C12 H12C 109.5 . . ? 
H12A C12 H12C 109.5 . . ? 
H12B C12 H12C 109.5 . . ? 
Si2 C13 H13A 109.5 . . ? 
Si2 C13 H13B 109.5 . . ? 
H13A C13 H13B 109.5 . . ? 
Si2 C13 H13C 109.5 . . ? 
H13A C13 H13C 109.5 . . ? 
H13B C13 H13C 109.5 . . ? 
Si2 C14 H14A 109.5 . . ? 
Si2 C14 H14B 109.5 . . ? 
H14A C14 H14B 109.5 . . ? 
Si2 C14 H14C 109.5 . . ? 
H14A C14 H14C 109.5 . . ? 
H14B C14 H14C 109.5 . . ? 
 
loop_ 
 _geom_torsion_atom_site_label_1 
 _geom_torsion_atom_site_label_2 
 _geom_torsion_atom_site_label_3 
 _geom_torsion_atom_site_label_4 
 _geom_torsion 
 _geom_torsion_site_symmetry_1 
 _geom_torsion_site_symmetry_2 
 _geom_torsion_site_symmetry_3 
 _geom_torsion_site_symmetry_4 
 _geom_torsion_publ_flag 
C5 S3 C1 C2 -0.4(4) . . . . ? 
C5 S3 C1 Si1 -179.6(3) . . . . ? 
C9 Si1 C1 C2 171.9(5) . . . . ? 
C10 Si1 C1 C2 52.5(5) . . . . ? 
C11 Si1 C1 C2 -68.3(6) . . . . ? 
C9 Si1 C1 S3 -9.1(4) . . . . ? 
C10 Si1 C1 S3 -128.6(4) . . . . ? 
C11 Si1 C1 S3 110.6(4) . . . . ? 
S3 C1 C2 C6 0.0(5) . . . . ? 
Si1 C1 C2 C6 179.0(3) . . . . ? 
S3 C1 C2 C3 -177.0(5) . . . . ? 
Si1 C1 C2 C3 2.1(8) . . . . ? 
C1 C2 C3 C4 178.5(5) . . . . ? 
C6 C2 C3 C4 1.5(6) . . . . ? 
C1 C2 C3 S1 1.1(9) . . . . ? 
C6 C2 C3 S1 -175.9(4) . . . . ? 
C7 S1 C3 C4 -0.3(5) . . . . ? 
C7 S1 C3 C2 177.2(6) . . . . ? 
C2 C3 C4 C8 -178.3(5) . . . . ? 
S1 C3 C4 C8 -0.3(6) . . . . ? 
C2 C3 C4 S2 -0.2(6) . . . . ? 
S1 C3 C4 S2 177.8(3) . . . . ? 
C6 S2 C4 C3 -0.9(4) . . . . ? 
C6 S2 C4 C8 176.8(6) . . . . ? 
C1 S3 C5 C6 0.8(4) . . . . ? 
C1 S3 C5 Si2 178.9(3) . . . . ? 
C12 Si2 C5 C6 43.3(8) . . . . ? 
C14 Si2 C5 C6 177.1(6) . . . . ? 
C13 Si2 C5 C6 -67.6(7) . . . . ? 
C12 Si2 C5 S3 -134.3(6) . . . . ? 
C14 Si2 C5 S3 -0.5(6) . . . . ? 
C13 Si2 C5 S3 114.8(5) . . . . ? 
S3 C5 C6 C2 -0.9(5) . . . . ? 
Si2 C5 C6 C2 -178.8(4) . . . . ? 
S3 C5 C6 S2 179.8(3) . . . . ? 
Si2 C5 C6 S2 1.9(8) . . . . ? 
C1 C2 C6 C5 0.7(6) . . . . ? 
C3 C2 C6 C5 178.5(4) . . . . ? 
C1 C2 C6 S2 -179.9(3) . . . . ? 
C3 C2 C6 S2 -2.1(5) . . . . ? 
C4 S2 C6 C5 -179.0(5) . . . . ? 
C4 S2 C6 C2 1.7(4) . . . . ? 
C3 S1 C7 C8 0.7(6) . . . . ? 
S1 C7 C8 C4 -1.0(8) . . . . ? 
C3 C4 C8 C7 0.8(8) . . . . ? 
S2 C4 C8 C7 -176.8(5) . . . . ? 
 
_diffrn_measured_fraction_theta_max    0.976 
_diffrn_reflns_theta_full              28.47 
_diffrn_measured_fraction_theta_full   0.976 
_refine_diff_density_max    0.757 
_refine_diff_density_min   -0.283 
_refine_diff_density_rms    0.078 

#======#
 
data_5 
 
_audit_creation_method            SHELXL-97 
_chemical_name_systematic 
; 
 ? 
; 
_chemical_name_common             ? 
_chemical_melting_point           ? 
_chemical_formula_moiety          ? 
_chemical_formula_sum 
 'C14 H19 Br S3 Si2' 
_chemical_formula_weight          419.56 
 
loop_ 
 _atom_type_symbol 
 _atom_type_description 
 _atom_type_scat_dispersion_real 
 _atom_type_scat_dispersion_imag 
 _atom_type_scat_source 
 'C'  'C'   0.0033   0.0016 
 'International Tables Vol C Tables 4.2.6.8 and 6.1.1.4' 
 'H'  'H'   0.0000   0.0000 
 'International Tables Vol C Tables 4.2.6.8 and 6.1.1.4' 
 'Si'  'Si'   0.0817   0.0704 
 'International Tables Vol C Tables 4.2.6.8 and 6.1.1.4' 
 'S'  'S'   0.1246   0.1234 
 'International Tables Vol C Tables 4.2.6.8 and 6.1.1.4' 
 'Br'  'Br'  -0.2901   2.4595 
 'International Tables Vol C Tables 4.2.6.8 and 6.1.1.4' 
 
_symmetry_cell_setting           'Monoclinic'
_symmetry_space_group_name_H-M   'C2/c  '
 
loop_ 
 _symmetry_equiv_pos_as_xyz 
 'x, y, z' 
 '-x, y, -z+1/2' 
 'x+1/2, y+1/2, z' 
 '-x+1/2, y+1/2, -z+1/2' 
 '-x, -y, -z' 
 'x, -y, z-1/2' 
 '-x+1/2, -y+1/2, -z' 
 'x+1/2, -y+1/2, z-1/2' 
 
_cell_length_a                    20.362(6) 
_cell_length_b                    9.842(3) 
_cell_length_c                    19.635(6) 
_cell_angle_alpha                 90.00 
_cell_angle_beta                  93.532(5) 
_cell_angle_gamma                 90.00 
_cell_volume                      3927.4(19) 
_cell_formula_units_Z             8 
_cell_measurement_temperature     296(2) 
_cell_measurement_reflns_used    3053
_cell_measurement_theta_min        2.30
_cell_measurement_theta_max       26.12
 
_exptl_crystal_description        block 
_exptl_crystal_colour             yellow 
_exptl_crystal_size_max           0.50 
_exptl_crystal_size_mid           0.35 
_exptl_crystal_size_min           0.31 
_exptl_crystal_density_meas       ? 
_exptl_crystal_density_diffrn     1.419 
_exptl_crystal_density_method     'not measured' 
_exptl_crystal_F_000              1712 
_exptl_absorpt_coefficient_mu     2.524 
_exptl_absorpt_correction_type    Multi-scan 
_exptl_absorpt_correction_T_min   0.3651 
_exptl_absorpt_correction_T_max   0.5084 
_exptl_absorpt_process_details    SADABS 
 
_exptl_special_details 
; 
 ? 
; 
 
_diffrn_ambient_temperature       296(2) 
_diffrn_radiation_wavelength      0.71073 
_diffrn_radiation_type            MoK\a 
_diffrn_radiation_source          'fine-focus sealed tube' 
_diffrn_radiation_monochromator   graphite 
_diffrn_measurement_device_type  'CCD area detector'
_diffrn_measurement_method       'phi and omega scans'
_diffrn_detector_area_resol_mean  ? 
_diffrn_reflns_number             9627 
_diffrn_reflns_av_R_equivalents   0.0333 
_diffrn_reflns_av_sigmaI/netI     0.0420 
_diffrn_reflns_limit_h_min        -24 
_diffrn_reflns_limit_h_max        19 
_diffrn_reflns_limit_k_min        -8 
_diffrn_reflns_limit_k_max        11 
_diffrn_reflns_limit_l_min        -23 
_diffrn_reflns_limit_l_max        23 
_diffrn_reflns_theta_min          2.00 
_diffrn_reflns_theta_max          25.00 
_reflns_number_total              3466 
_reflns_number_gt                 2600 
_reflns_threshold_expression      >2sigma(I) 
 
_computing_data_collection      'Bruker SMART'
_computing_cell_refinement      'Bruker SMART'
_computing_data_reduction       'Bruker SAINT'
_computing_structure_solution   'Bruker SHELXTL'
_computing_structure_refinement 'Bruker SHELXTL'
_computing_molecular_graphics   'Bruker SHELXTL'
_computing_publication_material 'Bruker SHELXTL'
 
_refine_special_details 
; 
 Refinement of F^2^ against ALL reflections.  The weighted R-factor wR and 
 goodness of fit S are based on F^2^, conventional R-factors R are based 
 on F, with F set to zero for negative F^2^. The threshold expression of 
 F^2^ > 2sigma(F^2^) is used only for calculating R-factors(gt) etc. and is 
 not relevant to the choice of reflections for refinement.  R-factors based 
 on F^2^ are statistically about twice as large as those based on F, and R- 
 factors based on ALL data will be even larger. 
; 
 
_refine_ls_structure_factor_coef  Fsqd  
_refine_ls_matrix_type            full 
_refine_ls_weighting_scheme       calc  
_refine_ls_weighting_details 
 'calc w=1/[\s^2^(Fo^2^)+(0.0643P)^2^+0.0000P] where P=(Fo^2^+2Fc^2^)/3' 
_atom_sites_solution_primary      direct 
_atom_sites_solution_secondary    difmap 
_atom_sites_solution_hydrogens    geom 
_refine_ls_hydrogen_treatment     constr 
_refine_ls_extinction_method      none 
_refine_ls_extinction_coef        ? 
_refine_ls_number_reflns          3466 
_refine_ls_number_parameters      181 
_refine_ls_number_restraints      0 
_refine_ls_R_factor_all           0.0582 
_refine_ls_R_factor_gt            0.0391 
_refine_ls_wR_factor_ref          0.1115 
_refine_ls_wR_factor_gt           0.1050 
_refine_ls_goodness_of_fit_ref    1.041 
_refine_ls_restrained_S_all       1.041 
_refine_ls_shift/su_max           0.000 
_refine_ls_shift/su_mean          0.000 
 
loop_ 
 _atom_site_label 
 _atom_site_type_symbol 
 _atom_site_fract_x 
 _atom_site_fract_y 
 _atom_site_fract_z 
 _atom_site_U_iso_or_equiv 
 _atom_site_adp_type 
 _atom_site_occupancy 
 _atom_site_symmetry_multiplicity 
 _atom_site_calc_flag 
 _atom_site_refinement_flags 
 _atom_site_disorder_assembly 
 _atom_site_disorder_group 
Br1 Br 0.084956(18) 0.85730(5) 0.06259(2) 0.07705(19) Uani 1 1 d . . . 
S1 S 0.45601(4) 0.54996(9) 0.15483(5) 0.0496(2) Uani 1 1 d . . . 
S2 S 0.36694(4) 0.91918(9) 0.08360(5) 0.0548(3) Uani 1 1 d . . . 
S3 S 0.20308(4) 0.66879(9) 0.10585(4) 0.0468(2) Uani 1 1 d . . . 
Si1 Si 0.54272(5) 0.80408(12) 0.12236(6) 0.0579(3) Uani 1 1 d . . . 
Si2 Si 0.32853(5) 0.38157(10) 0.17418(5) 0.0492(3) Uani 1 1 d . . . 
C1 C 0.5679(2) 0.7924(7) 0.0333(2) 0.113(2) Uani 1 1 d . . . 
H1A H 0.5361 0.8382 0.0033 0.170 Uiso 1 1 calc R . . 
H1B H 0.5705 0.6987 0.0202 0.170 Uiso 1 1 calc R . . 
H1C H 0.6101 0.8345 0.0302 0.170 Uiso 1 1 calc R . . 
C2 C 0.6042(2) 0.7167(6) 0.1795(2) 0.0977(17) Uani 1 1 d . . . 
H2A H 0.5914 0.7227 0.2257 0.147 Uiso 1 1 calc R . . 
H2B H 0.6464 0.7589 0.1762 0.147 Uiso 1 1 calc R . . 
H2C H 0.6068 0.6229 0.1665 0.147 Uiso 1 1 calc R . . 
C3 C 0.5330(3) 0.9849(5) 0.1453(4) 0.144(3) Uani 1 1 d . . . 
H3A H 0.5007 1.0263 0.1142 0.217 Uiso 1 1 calc R . . 
H3B H 0.5743 1.0309 0.1426 0.217 Uiso 1 1 calc R . . 
H3C H 0.5189 0.9913 0.1909 0.217 Uiso 1 1 calc R . . 
C4 C 0.46154(16) 0.7172(3) 0.12826(16) 0.0471(8) Uani 1 1 d . . . 
C5 C 0.39791(14) 0.7612(3) 0.11378(15) 0.0408(7) Uani 1 1 d . . . 
C6 C 0.34749(14) 0.6635(3) 0.12408(15) 0.0366(7) Uani 1 1 d . . . 
C7 C 0.37131(14) 0.5393(3) 0.14700(15) 0.0396(7) Uani 1 1 d . . . 
C8 C 0.2824(2) 0.3038(4) 0.0981(2) 0.0798(13) Uani 1 1 d . . . 
H8A H 0.2500 0.3669 0.0798 0.120 Uiso 1 1 calc R . . 
H8B H 0.2611 0.2220 0.1117 0.120 Uiso 1 1 calc R . . 
H8C H 0.3126 0.2827 0.0640 0.120 Uiso 1 1 calc R . . 
C9 C 0.3919(2) 0.2609(4) 0.2110(3) 0.0912(15) Uani 1 1 d . . . 
H9A H 0.4151 0.3021 0.2497 0.137 Uiso 1 1 calc R . . 
H9B H 0.4224 0.2395 0.1772 0.137 Uiso 1 1 calc R . . 
H9C H 0.3708 0.1792 0.2250 0.137 Uiso 1 1 calc R . . 
C10 C 0.27066(19) 0.4276(4) 0.23980(18) 0.0678(11) Uani 1 1 d . . . 
H10A H 0.2948 0.4661 0.2787 0.102 Uiso 1 1 calc R . . 
H10B H 0.2479 0.3477 0.2535 0.102 Uiso 1 1 calc R . . 
H10C H 0.2394 0.4927 0.2212 0.102 Uiso 1 1 calc R . . 
C11 C 0.28351(14) 0.7238(3) 0.10643(15) 0.0392(7) Uani 1 1 d . . . 
C12 C 0.28672(16) 0.8564(3) 0.08431(16) 0.0437(8) Uani 1 1 d . . . 
C13 C 0.22449(16) 0.9159(4) 0.06628(16) 0.0517(9) Uani 1 1 d . . . 
H13A H 0.2181 1.0042 0.0503 0.062 Uiso 1 1 calc R . . 
C14 C 0.17590(16) 0.8256(4) 0.07570(16) 0.0489(8) Uani 1 1 d . . . 
 
loop_ 
 _atom_site_aniso_label 
 _atom_site_aniso_U_11 
 _atom_site_aniso_U_22 
 _atom_site_aniso_U_33 
 _atom_site_aniso_U_23 
 _atom_site_aniso_U_13 
 _atom_site_aniso_U_12 
Br1 0.0406(2) 0.0895(4) 0.0997(4) -0.0081(2) -0.0060(2) 0.0154(2) 
S1 0.0310(4) 0.0497(5) 0.0683(6) 0.0056(4) 0.0048(4) -0.0025(4) 
S2 0.0446(5) 0.0443(5) 0.0752(6) 0.0129(4) 0.0020(4) -0.0102(4) 
S3 0.0304(4) 0.0522(5) 0.0581(5) -0.0035(4) 0.0039(3) -0.0047(4) 
Si1 0.0333(5) 0.0635(7) 0.0770(7) 0.0105(5) 0.0043(4) -0.0163(5) 
Si2 0.0451(5) 0.0407(5) 0.0621(6) 0.0057(4) 0.0048(4) -0.0087(4) 
C1 0.078(3) 0.179(6) 0.083(3) 0.035(4) 0.015(3) -0.044(4) 
C2 0.049(2) 0.143(5) 0.099(3) 0.039(3) -0.013(2) -0.027(3) 
C3 0.075(4) 0.079(4) 0.282(9) -0.031(5) 0.024(5) -0.041(3) 
C4 0.0412(18) 0.046(2) 0.054(2) 0.0044(16) 0.0055(14) -0.0062(16) 
C5 0.0335(16) 0.0420(18) 0.0473(18) 0.0012(14) 0.0055(13) -0.0061(14) 
C6 0.0294(15) 0.0393(17) 0.0416(16) -0.0038(13) 0.0057(12) -0.0065(13) 
C7 0.0278(15) 0.0429(19) 0.0486(18) -0.0012(14) 0.0060(13) -0.0044(14) 
C8 0.087(3) 0.067(3) 0.087(3) -0.021(2) 0.015(2) -0.031(3) 
C9 0.071(3) 0.061(3) 0.140(4) 0.031(3) 0.001(3) 0.005(2) 
C10 0.061(3) 0.082(3) 0.062(2) 0.014(2) 0.0126(18) -0.016(2) 
C11 0.0350(16) 0.0430(19) 0.0398(17) -0.0031(14) 0.0042(12) -0.0048(14) 
C12 0.0382(17) 0.048(2) 0.0450(18) -0.0001(15) 0.0026(13) -0.0005(15) 
C13 0.050(2) 0.050(2) 0.054(2) -0.0005(16) -0.0001(16) 0.0091(18) 
C14 0.0369(17) 0.058(2) 0.051(2) -0.0088(16) -0.0029(14) 0.0074(16) 
 
_geom_special_details 
; 
 All esds (except the esd in the dihedral angle between two l.s. planes) 
 are estimated using the full covariance matrix.  The cell esds are taken 
 into account individually in the estimation of esds in distances, angles 
 and torsion angles; correlations between esds in cell parameters are only 
 used when they are defined by crystal symmetry.  An approximate (isotropic) 
 treatment of cell esds is used for estimating esds involving l.s. planes. 
; 
 
loop_ 
 _geom_bond_atom_site_label_1 
 _geom_bond_atom_site_label_2 
 _geom_bond_distance 
 _geom_bond_site_symmetry_2 
 _geom_bond_publ_flag 
Br1 C14 1.880(3) . ? 
S1 C7 1.725(3) . ? 
S1 C4 1.732(3) . ? 
S2 C12 1.747(3) . ? 
S2 C5 1.766(3) . ? 
S3 C11 1.724(3) . ? 
S3 C14 1.732(4) . ? 
Si1 C2 1.842(4) . ? 
Si1 C3 1.849(5) . ? 
Si1 C1 1.857(5) . ? 
Si1 C4 1.871(3) . ? 
Si2 C10 1.855(4) . ? 
Si2 C9 1.866(4) . ? 
Si2 C7 1.873(3) . ? 
Si2 C8 1.878(4) . ? 
C1 H1A 0.9600 . ? 
C1 H1B 0.9600 . ? 
C1 H1C 0.9600 . ? 
C2 H2A 0.9600 . ? 
C2 H2B 0.9600 . ? 
C2 H2C 0.9600 . ? 
C3 H3A 0.9600 . ? 
C3 H3B 0.9600 . ? 
C3 H3C 0.9600 . ? 
C4 C5 1.379(4) . ? 
C5 C6 1.430(4) . ? 
C6 C7 1.381(4) . ? 
C6 C11 1.454(4) . ? 
C8 H8A 0.9600 . ? 
C8 H8B 0.9600 . ? 
C8 H8C 0.9600 . ? 
C9 H9A 0.9600 . ? 
C9 H9B 0.9600 . ? 
C9 H9C 0.9600 . ? 
C10 H10A 0.9600 . ? 
C10 H10B 0.9600 . ? 
C10 H10C 0.9600 . ? 
C11 C12 1.378(4) . ? 
C12 C13 1.421(5) . ? 
C13 C14 1.351(5) . ? 
C13 H13A 0.9300 . ? 
 
loop_ 
 _geom_angle_atom_site_label_1 
 _geom_angle_atom_site_label_2 
 _geom_angle_atom_site_label_3 
 _geom_angle 
 _geom_angle_site_symmetry_1 
 _geom_angle_site_symmetry_3 
 _geom_angle_publ_flag 
C7 S1 C4 96.56(15) . . ? 
C12 S2 C5 90.04(15) . . ? 
C11 S3 C14 90.33(16) . . ? 
C2 Si1 C3 112.3(3) . . ? 
C2 Si1 C1 109.2(3) . . ? 
C3 Si1 C1 109.2(3) . . ? 
C2 Si1 C4 108.57(18) . . ? 
C3 Si1 C4 108.5(2) . . ? 
C1 Si1 C4 109.1(2) . . ? 
C10 Si2 C9 109.9(2) . . ? 
C10 Si2 C7 108.80(17) . . ? 
C9 Si2 C7 108.35(18) . . ? 
C10 Si2 C8 110.12(19) . . ? 
C9 Si2 C8 110.4(2) . . ? 
C7 Si2 C8 109.25(17) . . ? 
Si1 C1 H1A 109.5 . . ? 
Si1 C1 H1B 109.5 . . ? 
H1A C1 H1B 109.5 . . ? 
Si1 C1 H1C 109.5 . . ? 
H1A C1 H1C 109.5 . . ? 
H1B C1 H1C 109.5 . . ? 
Si1 C2 H2A 109.5 . . ? 
Si1 C2 H2B 109.5 . . ? 
H2A C2 H2B 109.5 . . ? 
Si1 C2 H2C 109.5 . . ? 
H2A C2 H2C 109.5 . . ? 
H2B C2 H2C 109.5 . . ? 
Si1 C3 H3A 109.5 . . ? 
Si1 C3 H3B 109.5 . . ? 
H3A C3 H3B 109.5 . . ? 
Si1 C3 H3C 109.5 . . ? 
H3A C3 H3C 109.5 . . ? 
H3B C3 H3C 109.5 . . ? 
C5 C4 S1 106.5(2) . . ? 
C5 C4 Si1 131.8(3) . . ? 
S1 C4 Si1 121.79(19) . . ? 
C4 C5 C6 115.6(3) . . ? 
C4 C5 S2 131.1(2) . . ? 
C6 C5 S2 113.3(2) . . ? 
C7 C6 C5 113.6(3) . . ? 
C7 C6 C11 136.9(3) . . ? 
C5 C6 C11 109.4(3) . . ? 
C6 C7 S1 107.7(2) . . ? 
C6 C7 Si2 131.8(2) . . ? 
S1 C7 Si2 120.33(18) . . ? 
Si2 C8 H8A 109.5 . . ? 
Si2 C8 H8B 109.5 . . ? 
H8A C8 H8B 109.5 . . ? 
Si2 C8 H8C 109.5 . . ? 
H8A C8 H8C 109.5 . . ? 
H8B C8 H8C 109.5 . . ? 
Si2 C9 H9A 109.5 . . ? 
Si2 C9 H9B 109.5 . . ? 
H9A C9 H9B 109.5 . . ? 
Si2 C9 H9C 109.5 . . ? 
H9A C9 H9C 109.5 . . ? 
H9B C9 H9C 109.5 . . ? 
Si2 C10 H10A 109.5 . . ? 
Si2 C10 H10B 109.5 . . ? 
H10A C10 H10B 109.5 . . ? 
Si2 C10 H10C 109.5 . . ? 
H10A C10 H10C 109.5 . . ? 
H10B C10 H10C 109.5 . . ? 
C12 C11 C6 113.7(3) . . ? 
C12 C11 S3 111.0(2) . . ? 
C6 C11 S3 135.3(2) . . ? 
C11 C12 C13 114.2(3) . . ? 
C11 C12 S2 113.6(2) . . ? 
C13 C12 S2 132.2(3) . . ? 
C14 C13 C12 110.1(3) . . ? 
C14 C13 H13A 124.9 . . ? 
C12 C13 H13A 124.9 . . ? 
C13 C14 S3 114.3(3) . . ? 
C13 C14 Br1 126.6(3) . . ? 
S3 C14 Br1 119.1(2) . . ? 
 
loop_ 
 _geom_torsion_atom_site_label_1 
 _geom_torsion_atom_site_label_2 
 _geom_torsion_atom_site_label_3 
 _geom_torsion_atom_site_label_4 
 _geom_torsion 
 _geom_torsion_site_symmetry_1 
 _geom_torsion_site_symmetry_2 
 _geom_torsion_site_symmetry_3 
 _geom_torsion_site_symmetry_4 
 _geom_torsion_publ_flag 
C7 S1 C4 C5 -0.1(3) . . . . ? 
C7 S1 C4 Si1 -179.4(2) . . . . ? 
C2 Si1 C4 C5 157.8(3) . . . . ? 
C3 Si1 C4 C5 35.5(4) . . . . ? 
C1 Si1 C4 C5 -83.3(4) . . . . ? 
C2 Si1 C4 S1 -23.2(3) . . . . ? 
C3 Si1 C4 S1 -145.5(3) . . . . ? 
C1 Si1 C4 S1 95.7(3) . . . . ? 
S1 C4 C5 C6 0.2(3) . . . . ? 
Si1 C4 C5 C6 179.3(2) . . . . ? 
S1 C4 C5 S2 -179.3(2) . . . . ? 
Si1 C4 C5 S2 -0.1(5) . . . . ? 
C12 S2 C5 C4 179.3(3) . . . . ? 
C12 S2 C5 C6 -0.1(2) . . . . ? 
C4 C5 C6 C7 -0.2(4) . . . . ? 
S2 C5 C6 C7 179.4(2) . . . . ? 
C4 C5 C6 C11 -179.6(3) . . . . ? 
S2 C5 C6 C11 -0.1(3) . . . . ? 
C5 C6 C7 S1 0.1(3) . . . . ? 
C11 C6 C7 S1 179.3(3) . . . . ? 
C5 C6 C7 Si2 175.2(2) . . . . ? 
C11 C6 C7 Si2 -5.5(6) . . . . ? 
C4 S1 C7 C6 0.0(2) . . . . ? 
C4 S1 C7 Si2 -175.78(19) . . . . ? 
C10 Si2 C7 C6 -52.5(4) . . . . ? 
C9 Si2 C7 C6 -171.9(3) . . . . ? 
C8 Si2 C7 C6 67.8(3) . . . . ? 
C10 Si2 C7 S1 122.2(2) . . . . ? 
C9 Si2 C7 S1 2.7(3) . . . . ? 
C8 Si2 C7 S1 -117.6(2) . . . . ? 
C7 C6 C11 C12 -179.0(3) . . . . ? 
C5 C6 C11 C12 0.3(4) . . . . ? 
C7 C6 C11 S3 0.5(6) . . . . ? 
C5 C6 C11 S3 179.8(3) . . . . ? 
C14 S3 C11 C12 0.1(2) . . . . ? 
C14 S3 C11 C6 -179.4(3) . . . . ? 
C6 C11 C12 C13 179.4(3) . . . . ? 
S3 C11 C12 C13 -0.2(3) . . . . ? 
C6 C11 C12 S2 -0.4(3) . . . . ? 
S3 C11 C12 S2 179.96(16) . . . . ? 
C5 S2 C12 C11 0.3(2) . . . . ? 
C5 S2 C12 C13 -179.5(3) . . . . ? 
C11 C12 C13 C14 0.2(4) . . . . ? 
S2 C12 C13 C14 -180.0(3) . . . . ? 
C12 C13 C14 S3 -0.1(4) . . . . ? 
C12 C13 C14 Br1 177.4(2) . . . . ? 
C11 S3 C14 C13 0.0(3) . . . . ? 
C11 S3 C14 Br1 -177.69(19) . . . . ? 
 
_diffrn_measured_fraction_theta_max    0.999 
_diffrn_reflns_theta_full              25.00 
_diffrn_measured_fraction_theta_full   0.999 
_refine_diff_density_max    0.749 
_refine_diff_density_min   -0.338 
_refine_diff_density_rms    0.062 

#======#
 
data_HT-2 

# start Validation Reply Form
_vrf_PLAT430_1
;
PROBLEM: Short Inter D...A Contact  O1W    ..  O2W     ..       2.22 Ang.  
RESPONSE: The O1W and O2W are disordered water molecules.
;
# end Validation Reply Form
 
_audit_creation_method            SHELXL-97 
_chemical_name_systematic 
; 
 ? 
; 
_chemical_name_common             ? 
_chemical_melting_point           ? 
_chemical_formula_moiety          ? 
_chemical_formula_sum 
 'C28 H36 Cl0 O3 S7 Si4' 
_chemical_formula_weight          757.35 
 
loop_ 
 _atom_type_symbol 
 _atom_type_description 
 _atom_type_scat_dispersion_real 
 _atom_type_scat_dispersion_imag 
 _atom_type_scat_source 
 'C'  'C'   0.0033   0.0016 
 'International Tables Vol C Tables 4.2.6.8 and 6.1.1.4' 
 'H'  'H'   0.0000   0.0000 
 'International Tables Vol C Tables 4.2.6.8 and 6.1.1.4' 
 'Si'  'Si'   0.0817   0.0704 
 'International Tables Vol C Tables 4.2.6.8 and 6.1.1.4' 
 'S'  'S'   0.1246   0.1234 
 'International Tables Vol C Tables 4.2.6.8 and 6.1.1.4' 
 'Cl'  'Cl'   0.1484   0.1585 
 'International Tables Vol C Tables 4.2.6.8 and 6.1.1.4' 
 'O'  'O'   0.0106   0.0060 
 'International Tables Vol C Tables 4.2.6.8 and 6.1.1.4' 
 
_symmetry_cell_setting           'Orthorhombic'
_symmetry_space_group_name_H-M   'Pnma ' 
 
loop_ 
 _symmetry_equiv_pos_as_xyz 
 'x, y, z' 
 '-x+1/2, -y, z+1/2' 
 '-x, y+1/2, -z' 
 'x+1/2, -y+1/2, -z+1/2' 
 '-x, -y, -z' 
 'x-1/2, y, -z-1/2' 
 'x, -y-1/2, z' 
 '-x-1/2, y-1/2, z-1/2' 
 
_cell_length_a                    11.669(2) 
_cell_length_b                    33.953(7) 
_cell_length_c                    10.210(2) 
_cell_angle_alpha                 90.00 
_cell_angle_beta                  90.00 
_cell_angle_gamma                 90.00 
_cell_volume                      4045.2(14) 
_cell_formula_units_Z             4 
_cell_measurement_temperature     296(2) 
_cell_measurement_reflns_used    2714
_cell_measurement_theta_min        2.65
_cell_measurement_theta_max       23.42
 
_exptl_crystal_description        block 
_exptl_crystal_colour             colorless 
_exptl_crystal_size_max           0.31 
_exptl_crystal_size_mid           0.20 
_exptl_crystal_size_min           0.07 
_exptl_crystal_density_meas       ? 
_exptl_crystal_density_diffrn     1.244 
_exptl_crystal_density_method     'not measured' 
_exptl_crystal_F_000              1584 
_exptl_absorpt_coefficient_mu     0.535 
_exptl_absorpt_correction_type    Multi-scan 
_exptl_absorpt_correction_T_min   0.8518 
_exptl_absorpt_correction_T_max   0.9635 
_exptl_absorpt_process_details    SADABS 
 
_exptl_special_details 
; 
 ? 
; 
 
_diffrn_ambient_temperature       296(2) 
_diffrn_radiation_wavelength      0.71073 
_diffrn_radiation_type            MoK\a 
_diffrn_radiation_source          'fine-focus sealed tube' 
_diffrn_radiation_monochromator   graphite 
_diffrn_measurement_device_type  'Bruker APEX-II CCD'
_diffrn_measurement_method       '\f and \w scans' 
_diffrn_detector_area_resol_mean  ? 
_diffrn_reflns_number             19483 
_diffrn_reflns_av_R_equivalents   0.0677 
_diffrn_reflns_av_sigmaI/netI     0.0467 
_diffrn_reflns_limit_h_min        -13 
_diffrn_reflns_limit_h_max        13 
_diffrn_reflns_limit_k_min        -39 
_diffrn_reflns_limit_k_max        40 
_diffrn_reflns_limit_l_min        -4 
_diffrn_reflns_limit_l_max        12 
_diffrn_reflns_theta_min          2.08 
_diffrn_reflns_theta_max          25.00 
_reflns_number_total              3597 
_reflns_number_gt                 2469 
_reflns_threshold_expression      >2sigma(I) 
 
_computing_data_collection      'Bruker APEX2'
_computing_cell_refinement      'Bruker SAINT'
_computing_data_reduction       'Bruker SAINT'  
_computing_structure_solution   'SHELXS-97 (Sheldrick, 2008)'
_computing_structure_refinement 'SHELXL-97 (Sheldrick, 2008)'
_computing_molecular_graphics   'Bruker SHELXTL'
_computing_publication_material 'Bruker SHELXTL'
 
_refine_special_details 
; 
 Refinement of F^2^ against ALL reflections.  The weighted R-factor wR and 
 goodness of fit S are based on F^2^, conventional R-factors R are based 
 on F, with F set to zero for negative F^2^. The threshold expression of 
 F^2^ > 2sigma(F^2^) is used only for calculating R-factors(gt) etc. and is 
 not relevant to the choice of reflections for refinement.  R-factors based 
 on F^2^ are statistically about twice as large as those based on F, and R- 
 factors based on ALL data will be even larger. 
; 
 
_refine_ls_structure_factor_coef  Fsqd  
_refine_ls_matrix_type            full 
_refine_ls_weighting_scheme       calc  
_refine_ls_weighting_details 
 'calc w=1/[\s^2^(Fo^2^)+(0.0500P)^2^+17.9693P] where P=(Fo^2^+2Fc^2^)/3' 
_atom_sites_solution_primary      direct 
_atom_sites_solution_secondary    difmap 
_atom_sites_solution_hydrogens    geom 
_refine_ls_hydrogen_treatment     constr
_refine_ls_extinction_method      none 
_refine_ls_extinction_coef        ? 
_refine_ls_number_reflns          3597 
_refine_ls_number_parameters      199 
_refine_ls_number_restraints      6 
_refine_ls_R_factor_all           0.0963 
_refine_ls_R_factor_gt            0.0636 
_refine_ls_wR_factor_ref          0.1804 
_refine_ls_wR_factor_gt           0.1597 
_refine_ls_goodness_of_fit_ref    1.085 
_refine_ls_restrained_S_all       1.092 
_refine_ls_shift/su_max           0.000 
_refine_ls_shift/su_mean          0.000 
 
loop_ 
 _atom_site_label 
 _atom_site_type_symbol 
 _atom_site_fract_x 
 _atom_site_fract_y 
 _atom_site_fract_z 
 _atom_site_U_iso_or_equiv 
 _atom_site_adp_type 
 _atom_site_occupancy 
 _atom_site_symmetry_multiplicity 
 _atom_site_calc_flag 
 _atom_site_refinement_flags 
 _atom_site_disorder_assembly 
 _atom_site_disorder_group 
S1 S 0.66950(12) 0.42923(4) 1.01916(15) 0.0430(4) Uani 1 1 d . . . 
S2 S 0.69480(13) 0.30472(4) 1.02430(15) 0.0431(4) Uani 1 1 d . . . 
S3 S 0.93634(15) 0.33637(4) 0.73670(18) 0.0589(5) Uani 1 1 d . . . 
S4 S 1.0046(2) 0.2500 0.6587(3) 0.0703(9) Uani 1 2 d S . . 
Si1 Si 0.85255(14) 0.44736(5) 0.80698(17) 0.0432(4) Uani 1 1 d . . . 
Si2 Si 0.52390(15) 0.37849(5) 1.21610(17) 0.0493(5) Uani 1 1 d . . . 
C1 C 0.7954(7) 0.49745(19) 0.8380(9) 0.078(2) Uani 1 1 d . . . 
H1A H 0.7160 0.4984 0.8138 0.117 Uiso 1 1 calc R . . 
H1B H 0.8376 0.5163 0.7870 0.117 Uiso 1 1 calc R . . 
H1C H 0.8032 0.5036 0.9294 0.117 Uiso 1 1 calc R . . 
C2 C 1.0061(6) 0.4447(2) 0.8514(8) 0.079(2) Uani 1 1 d . . . 
H2A H 1.0345 0.4187 0.8341 0.118 Uiso 1 1 calc R . . 
H2B H 1.0151 0.4507 0.9427 0.118 Uiso 1 1 calc R . . 
H2C H 1.0484 0.4635 0.8003 0.118 Uiso 1 1 calc R . . 
C3 C 0.8375(7) 0.4353(2) 0.6319(7) 0.070(2) Uani 1 1 d . . . 
H3A H 0.7581 0.4366 0.6076 0.106 Uiso 1 1 calc R . . 
H3B H 0.8660 0.4093 0.6162 0.106 Uiso 1 1 calc R . . 
H3C H 0.8804 0.4539 0.5807 0.106 Uiso 1 1 calc R . . 
C4 C 0.7706(5) 0.41213(15) 0.9095(5) 0.0381(13) Uani 1 1 d . . . 
C5 C 0.7722(4) 0.37143(15) 0.9191(5) 0.0353(12) Uani 1 1 d . . . 
C6 C 0.6929(4) 0.35627(15) 1.0133(5) 0.0365(12) Uani 1 1 d . . . 
C7 C 0.6293(5) 0.38395(16) 1.0796(5) 0.0386(13) Uani 1 1 d . . . 
C8 C 0.6057(7) 0.3724(3) 1.3685(7) 0.093(3) Uani 1 1 d . . . 
H8A H 0.6517 0.3955 1.3833 0.140 Uiso 1 1 calc R . . 
H8B H 0.6545 0.3498 1.3613 0.140 Uiso 1 1 calc R . . 
H8C H 0.5538 0.3689 1.4404 0.140 Uiso 1 1 calc R . . 
C9 C 0.4355(6) 0.4235(2) 1.2278(8) 0.078(2) Uani 1 1 d . . . 
H9A H 0.4838 0.4456 1.2471 0.117 Uiso 1 1 calc R . . 
H9B H 0.3799 0.4203 1.2964 0.117 Uiso 1 1 calc R . . 
H9C H 0.3969 0.4278 1.1461 0.117 Uiso 1 1 calc R . . 
C10 C 0.4334(7) 0.3346(3) 1.1797(9) 0.100(3) Uani 1 1 d . . . 
H10A H 0.3781 0.3311 1.2484 0.150 Uiso 1 1 calc R . . 
H10B H 0.4811 0.3116 1.1741 0.150 Uiso 1 1 calc R . . 
H10C H 0.3943 0.3384 1.0979 0.150 Uiso 1 1 calc R . . 
C11 C 0.8320(5) 0.33958(15) 0.8583(6) 0.0423(14) Uani 1 1 d . . . 
C12 C 0.7997(5) 0.30296(16) 0.9025(6) 0.0422(14) Uani 1 1 d . . . 
C13 C 0.8566(5) 0.27133(16) 0.8390(6) 0.0471(15) Uani 1 1 d . . . 
C14 C 0.9320(6) 0.28554(16) 0.7466(7) 0.0564(18) Uani 1 1 d . . . 
O1W O 0.5301(15) 0.2500 1.3779(13) 0.087(5) Uani 0.50 2 d SP . . 
O2W O 0.7164(12) 0.2500 1.3360(9) 0.059(3) Uani 0.50 2 d SPU . . 
O3W O 0.6868(5) 0.29255(13) 1.5699(4) 0.0749(15) Uani 1 1 d . . . 
 
loop_ 
 _atom_site_aniso_label 
 _atom_site_aniso_U_11 
 _atom_site_aniso_U_22 
 _atom_site_aniso_U_33 
 _atom_site_aniso_U_23 
 _atom_site_aniso_U_13 
 _atom_site_aniso_U_12 
S1 0.0444(8) 0.0358(8) 0.0488(9) -0.0065(7) 0.0081(7) 0.0034(6) 
S2 0.0491(9) 0.0341(7) 0.0460(8) -0.0041(6) 0.0176(7) -0.0077(6) 
S3 0.0722(11) 0.0306(8) 0.0738(11) 0.0017(8) 0.0428(9) -0.0006(7) 
S4 0.0874(19) 0.0336(12) 0.0900(19) 0.000 0.0587(16) 0.000 
Si1 0.0424(9) 0.0368(9) 0.0505(10) 0.0069(7) 0.0059(8) 0.0003(7) 
Si2 0.0431(9) 0.0590(11) 0.0459(10) -0.0038(8) 0.0131(8) 0.0032(8) 
C1 0.086(6) 0.043(4) 0.105(6) 0.010(4) 0.022(5) 0.003(4) 
C2 0.046(4) 0.088(6) 0.102(6) 0.026(5) -0.004(4) -0.011(4) 
C3 0.079(5) 0.082(5) 0.051(4) 0.006(4) 0.007(4) 0.008(4) 
C4 0.037(3) 0.033(3) 0.045(3) -0.005(2) 0.005(3) 0.000(2) 
C5 0.035(3) 0.032(3) 0.039(3) -0.003(2) 0.007(2) 0.000(2) 
C6 0.037(3) 0.034(3) 0.038(3) -0.006(2) 0.005(2) -0.004(2) 
C7 0.035(3) 0.042(3) 0.038(3) -0.004(3) 0.003(2) -0.003(2) 
C8 0.082(6) 0.146(9) 0.052(5) 0.010(5) 0.002(4) 0.030(6) 
C9 0.063(5) 0.099(6) 0.072(5) -0.004(4) 0.016(4) 0.027(4) 
C10 0.088(6) 0.094(6) 0.119(7) -0.017(6) 0.052(6) -0.036(5) 
C11 0.046(3) 0.031(3) 0.049(3) 0.001(3) 0.018(3) -0.002(3) 
C12 0.048(3) 0.035(3) 0.044(3) -0.001(3) 0.017(3) -0.001(3) 
C13 0.057(4) 0.032(3) 0.053(4) -0.001(3) 0.022(3) -0.001(3) 
C14 0.067(4) 0.030(3) 0.073(4) -0.002(3) 0.039(4) -0.002(3) 
O1W 0.113(13) 0.105(12) 0.043(8) 0.000 -0.032(8) 0.000 
O2W 0.113(8) 0.055(6) 0.010(4) 0.000 0.015(5) 0.000 
O3W 0.133(5) 0.046(3) 0.046(3) 0.004(2) -0.008(3) 0.003(3) 
 
_geom_special_details 
; 
 All esds (except the esd in the dihedral angle between two l.s. planes) 
 are estimated using the full covariance matrix.  The cell esds are taken 
 into account individually in the estimation of esds in distances, angles 
 and torsion angles; correlations between esds in cell parameters are only 
 used when they are defined by crystal symmetry.  An approximate (isotropic) 
 treatment of cell esds is used for estimating esds involving l.s. planes. 
; 
 
loop_ 
 _geom_bond_atom_site_label_1 
 _geom_bond_atom_site_label_2 
 _geom_bond_distance 
 _geom_bond_site_symmetry_2 
 _geom_bond_publ_flag 
S1 C7 1.722(6) . ? 
S1 C4 1.727(5) . ? 
S2 C12 1.746(5) . ? 
S2 C6 1.754(5) . ? 
S3 C14 1.729(6) . ? 
S3 C11 1.742(6) . ? 
S4 C14 1.726(6) 7_565 ? 
S4 C14 1.726(6) . ? 
Si1 C3 1.842(7) . ? 
Si1 C2 1.850(7) . ? 
Si1 C1 1.854(7) . ? 
Si1 C4 1.855(6) . ? 
Si2 C8 1.837(8) . ? 
Si2 C9 1.846(7) . ? 
Si2 C10 1.865(8) . ? 
Si2 C7 1.868(6) . ? 
C1 H1A 0.9600 . ? 
C1 H1B 0.9600 . ? 
C1 H1C 0.9600 . ? 
C2 H2A 0.9600 . ? 
C2 H2B 0.9600 . ? 
C2 H2C 0.9600 . ? 
C3 H3A 0.9600 . ? 
C3 H3B 0.9600 . ? 
C3 H3C 0.9600 . ? 
C4 C5 1.385(7) . ? 
C5 C11 1.430(7) . ? 
C5 C6 1.430(7) . ? 
C6 C7 1.376(7) . ? 
C8 H8A 0.9600 . ? 
C8 H8B 0.9600 . ? 
C8 H8C 0.9600 . ? 
C9 H9A 0.9600 . ? 
C9 H9B 0.9600 . ? 
C9 H9C 0.9600 . ? 
C10 H10A 0.9600 . ? 
C10 H10B 0.9600 . ? 
C10 H10C 0.9600 . ? 
C11 C12 1.375(7) . ? 
C12 C13 1.419(7) . ? 
C13 C14 1.378(8) . ? 
C13 C13 1.448(11) 7_565 ? 
 
loop_ 
 _geom_angle_atom_site_label_1 
 _geom_angle_atom_site_label_2 
 _geom_angle_atom_site_label_3 
 _geom_angle 
 _geom_angle_site_symmetry_1 
 _geom_angle_site_symmetry_3 
 _geom_angle_publ_flag 
C7 S1 C4 96.8(3) . . ? 
C12 S2 C6 89.9(3) . . ? 
C14 S3 C11 90.0(3) . . ? 
C14 S4 C14 88.7(4) 7_565 . ? 
C3 Si1 C2 108.6(4) . . ? 
C3 Si1 C1 109.6(4) . . ? 
C2 Si1 C1 110.5(4) . . ? 
C3 Si1 C4 110.8(3) . . ? 
C2 Si1 C4 109.3(3) . . ? 
C1 Si1 C4 108.0(3) . . ? 
C8 Si2 C9 109.1(4) . . ? 
C8 Si2 C10 112.0(5) . . ? 
C9 Si2 C10 111.0(4) . . ? 
C8 Si2 C7 107.5(3) . . ? 
C9 Si2 C7 109.5(3) . . ? 
C10 Si2 C7 107.7(3) . . ? 
Si1 C1 H1A 109.5 . . ? 
Si1 C1 H1B 109.5 . . ? 
H1A C1 H1B 109.5 . . ? 
Si1 C1 H1C 109.5 . . ? 
H1A C1 H1C 109.5 . . ? 
H1B C1 H1C 109.5 . . ? 
Si1 C2 H2A 109.5 . . ? 
Si1 C2 H2B 109.5 . . ? 
H2A C2 H2B 109.5 . . ? 
Si1 C2 H2C 109.5 . . ? 
H2A C2 H2C 109.5 . . ? 
H2B C2 H2C 109.5 . . ? 
Si1 C3 H3A 109.5 . . ? 
Si1 C3 H3B 109.5 . . ? 
H3A C3 H3B 109.5 . . ? 
Si1 C3 H3C 109.5 . . ? 
H3A C3 H3C 109.5 . . ? 
H3B C3 H3C 109.5 . . ? 
C5 C4 S1 107.4(4) . . ? 
C5 C4 Si1 132.5(4) . . ? 
S1 C4 Si1 120.1(3) . . ? 
C4 C5 C11 136.9(5) . . ? 
C4 C5 C6 113.4(5) . . ? 
C11 C5 C6 109.6(4) . . ? 
C7 C6 C5 115.7(5) . . ? 
C7 C6 S2 131.1(4) . . ? 
C5 C6 S2 113.2(4) . . ? 
C6 C7 S1 106.7(4) . . ? 
C6 C7 Si2 130.9(4) . . ? 
S1 C7 Si2 122.4(3) . . ? 
Si2 C8 H8A 109.5 . . ? 
Si2 C8 H8B 109.5 . . ? 
H8A C8 H8B 109.5 . . ? 
Si2 C8 H8C 109.5 . . ? 
H8A C8 H8C 109.5 . . ? 
H8B C8 H8C 109.5 . . ? 
Si2 C9 H9A 109.5 . . ? 
Si2 C9 H9B 109.5 . . ? 
H9A C9 H9B 109.5 . . ? 
Si2 C9 H9C 109.5 . . ? 
H9A C9 H9C 109.5 . . ? 
H9B C9 H9C 109.5 . . ? 
Si2 C10 H10A 109.5 . . ? 
Si2 C10 H10B 109.5 . . ? 
H10A C10 H10B 109.5 . . ? 
Si2 C10 H10C 109.5 . . ? 
H10A C10 H10C 109.5 . . ? 
H10B C10 H10C 109.5 . . ? 
C12 C11 C5 114.0(5) . . ? 
C12 C11 S3 111.7(4) . . ? 
C5 C11 S3 134.3(4) . . ? 
C11 C12 C13 113.9(5) . . ? 
C11 C12 S2 113.3(4) . . ? 
C13 C12 S2 132.8(4) . . ? 
C14 C13 C12 110.3(5) . . ? 
C14 C13 C13 110.5(3) . 7_565 ? 
C12 C13 C13 139.2(3) . 7_565 ? 
C13 C14 S4 115.1(4) . . ? 
C13 C14 S3 114.1(4) . . ? 
S4 C14 S3 130.8(4) . . ? 
 
loop_ 
 _geom_torsion_atom_site_label_1 
 _geom_torsion_atom_site_label_2 
 _geom_torsion_atom_site_label_3 
 _geom_torsion_atom_site_label_4 
 _geom_torsion 
 _geom_torsion_site_symmetry_1 
 _geom_torsion_site_symmetry_2 
 _geom_torsion_site_symmetry_3 
 _geom_torsion_site_symmetry_4 
 _geom_torsion_publ_flag 
C7 S1 C4 C5 0.5(4) . . . . ? 
C7 S1 C4 Si1 -179.4(3) . . . . ? 
C3 Si1 C4 C5 55.4(7) . . . . ? 
C2 Si1 C4 C5 -64.3(7) . . . . ? 
C1 Si1 C4 C5 175.4(6) . . . . ? 
C3 Si1 C4 S1 -124.7(4) . . . . ? 
C2 Si1 C4 S1 115.6(4) . . . . ? 
C1 Si1 C4 S1 -4.6(5) . . . . ? 
S1 C4 C5 C11 179.1(6) . . . . ? 
Si1 C4 C5 C11 -0.9(11) . . . . ? 
S1 C4 C5 C6 -0.1(6) . . . . ? 
Si1 C4 C5 C6 179.9(4) . . . . ? 
C4 C5 C6 C7 -0.6(7) . . . . ? 
C11 C5 C6 C7 180.0(5) . . . . ? 
C4 C5 C6 S2 179.7(4) . . . . ? 
C11 C5 C6 S2 0.2(6) . . . . ? 
C12 S2 C6 C7 179.7(6) . . . . ? 
C12 S2 C6 C5 -0.6(4) . . . . ? 
C5 C6 C7 S1 0.9(6) . . . . ? 
S2 C6 C7 S1 -179.4(4) . . . . ? 
C5 C6 C7 Si2 -175.7(4) . . . . ? 
S2 C6 C7 Si2 4.0(9) . . . . ? 
C4 S1 C7 C6 -0.8(4) . . . . ? 
C4 S1 C7 Si2 176.1(3) . . . . ? 
C8 Si2 C7 C6 79.0(6) . . . . ? 
C9 Si2 C7 C6 -162.5(6) . . . . ? 
C10 Si2 C7 C6 -41.8(7) . . . . ? 
C8 Si2 C7 S1 -97.2(5) . . . . ? 
C9 Si2 C7 S1 21.3(5) . . . . ? 
C10 Si2 C7 S1 142.0(5) . . . . ? 
C4 C5 C11 C12 -178.8(7) . . . . ? 
C6 C5 C11 C12 0.5(7) . . . . ? 
C4 C5 C11 S3 -0.3(12) . . . . ? 
C6 C5 C11 S3 179.0(5) . . . . ? 
C14 S3 C11 C12 1.0(5) . . . . ? 
C14 S3 C11 C5 -177.6(7) . . . . ? 
C5 C11 C12 C13 178.1(5) . . . . ? 
S3 C11 C12 C13 -0.7(7) . . . . ? 
C5 C11 C12 S2 -1.0(7) . . . . ? 
S3 C11 C12 S2 -179.8(3) . . . . ? 
C6 S2 C12 C11 0.9(5) . . . . ? 
C6 S2 C12 C13 -177.9(7) . . . . ? 
C11 C12 C13 C14 0.0(8) . . . . ? 
S2 C12 C13 C14 178.9(6) . . . . ? 
C11 C12 C13 C13 -177.3(4) . . . 7_565 ? 
S2 C12 C13 C13 1.6(10) . . . 7_565 ? 
C12 C13 C14 S4 -178.4(5) . . . . ? 
C13 C13 C14 S4 -0.3(6) 7_565 . . . ? 
C12 C13 C14 S3 0.7(8) . . . . ? 
C13 C13 C14 S3 178.8(3) 7_565 . . . ? 
C14 S4 C14 C13 0.4(8) 7_565 . . . ? 
C14 S4 C14 S3 -178.6(3) 7_565 . . . ? 
C11 S3 C14 C13 -1.0(6) . . . . ? 
C11 S3 C14 S4 178.0(6) . . . . ? 
 
_diffrn_measured_fraction_theta_max    0.993 
_diffrn_reflns_theta_full              25.00 
_diffrn_measured_fraction_theta_full   0.993 
_refine_diff_density_max    1.334 
_refine_diff_density_min   -0.431 
_refine_diff_density_rms    0.104 
#======#
